# Supplementary material
Source: PubMed Central journal article supplement (PMC9486943)
Supplement: jo2c01047_si_001.pdf [file jo2c01047_si_001.pdf]

# Peptidomimetic small-molecule inhibitors of 3CLPro activity and Spike-ACE2 interaction: towards dual-action molecules against Coronavirus infections

Filomena Tedesco, Lorenzo Calugi, Elena Lenci, Andrea Trabocchi\*

*Department of Chemistry "Ugo Schiff", University of Florence, via della Lastruccia 13, 50019 Sesto Fiorentino, Florence, Italy*

## Supporting Information

|                                                                    |        |
|--------------------------------------------------------------------|--------|
| Copies of $^1\text{H}$ and $^{13}\text{C}$ NMR for <b>2-14</b>     | S2-S19 |
| Figure S1: HPLC chromatogram of <b>15</b>                          | S20    |
| Figure S2: HPLC chromatogram of <b>16</b>                          | S21    |
| Figure S3: $^1\text{H}$ -ES of <b>16</b>                           | S22    |
| Figure S4: TOCSY-ES of <b>16</b>                                   | S23    |
| Figure S5: Inhibition curve of <b>15</b> on 3CLPro enzyme          | S24    |
| Figure S6: Inhibition curve of <b>16</b> on 3CLPro enzyme          | S24    |
| Figure S7: Inhibition curve of <b>16</b> on Spike-ACE2 interaction | S24    |

$^1\text{H}$  NMR (400 MHz,  $\text{CDCl}_3$ )

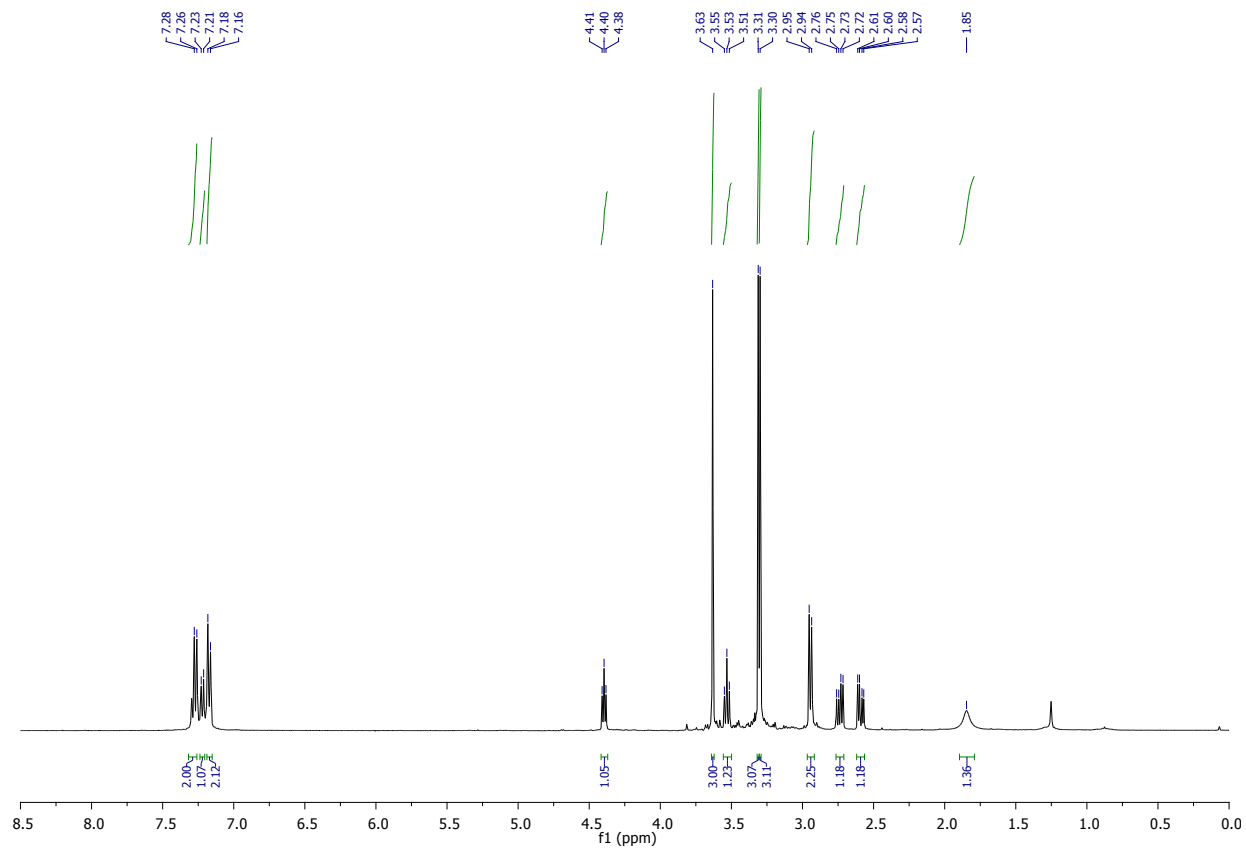

$^{13}\text{C}\{^1\text{H}\}$  NMR (100 MHz,  $\text{CDCl}_3$ )

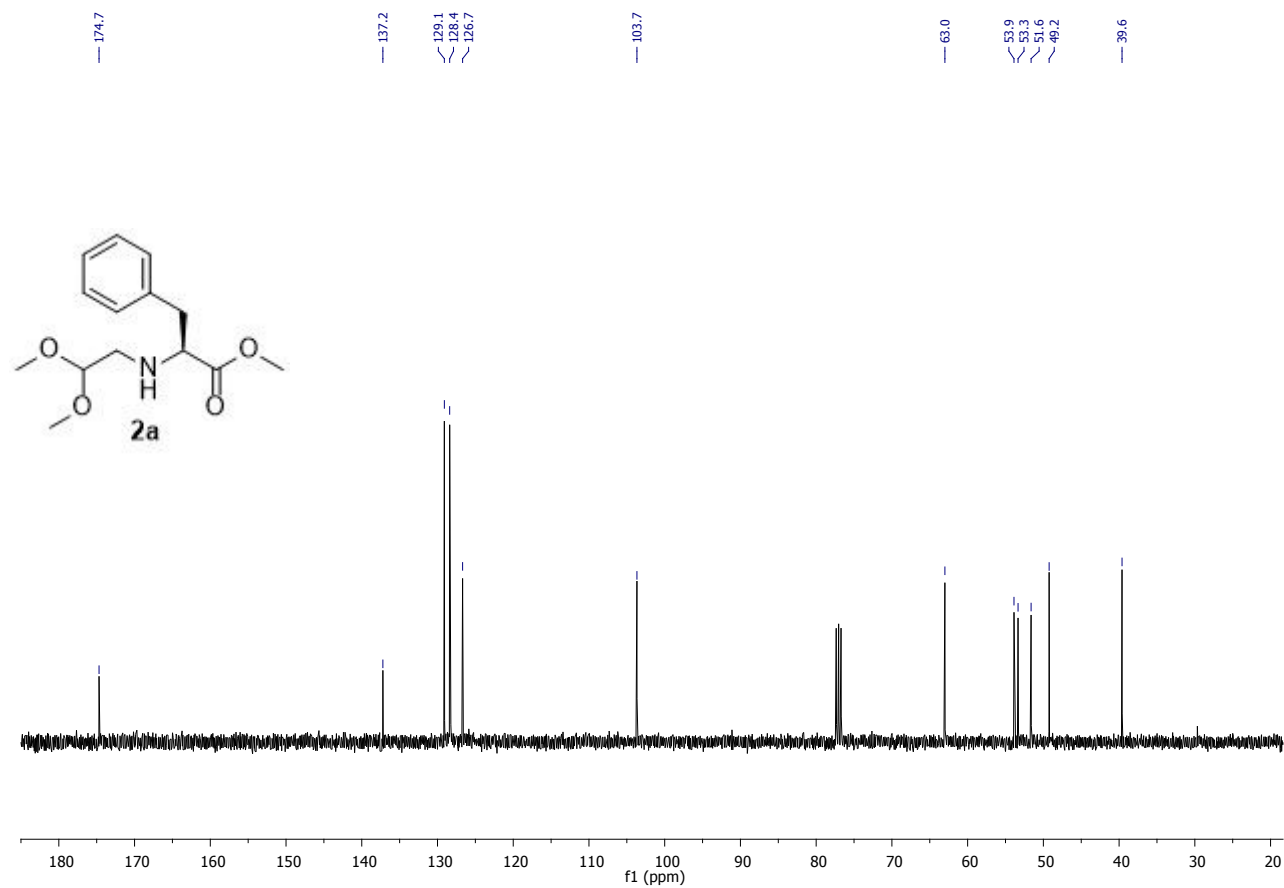

$^1\text{H}$  NMR (400 MHz,  $\text{CDCl}_3$ )

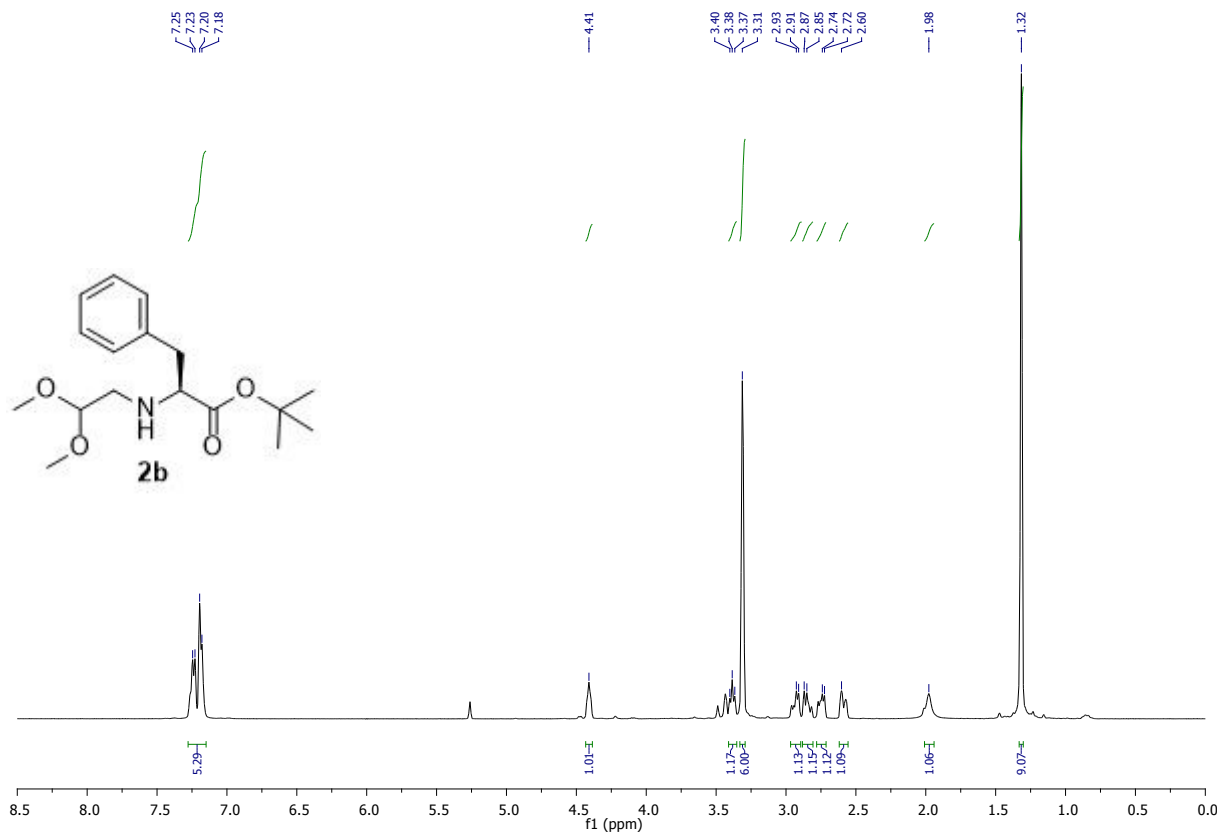

$^{13}\text{C}\{^1\text{H}\}$  NMR (100 MHz,  $\text{CDCl}_3$ )

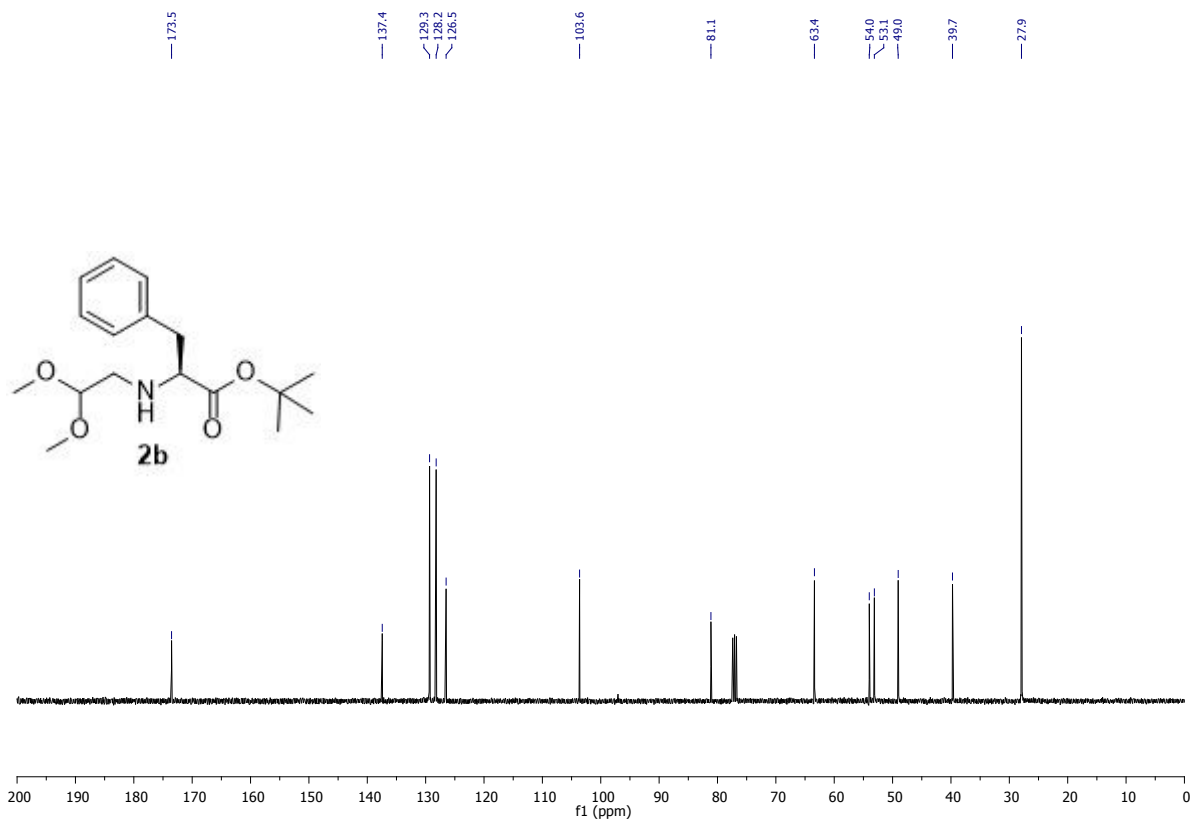

$^1\text{H}$  NMR (200 MHz,  $\text{CDCl}_3$ )

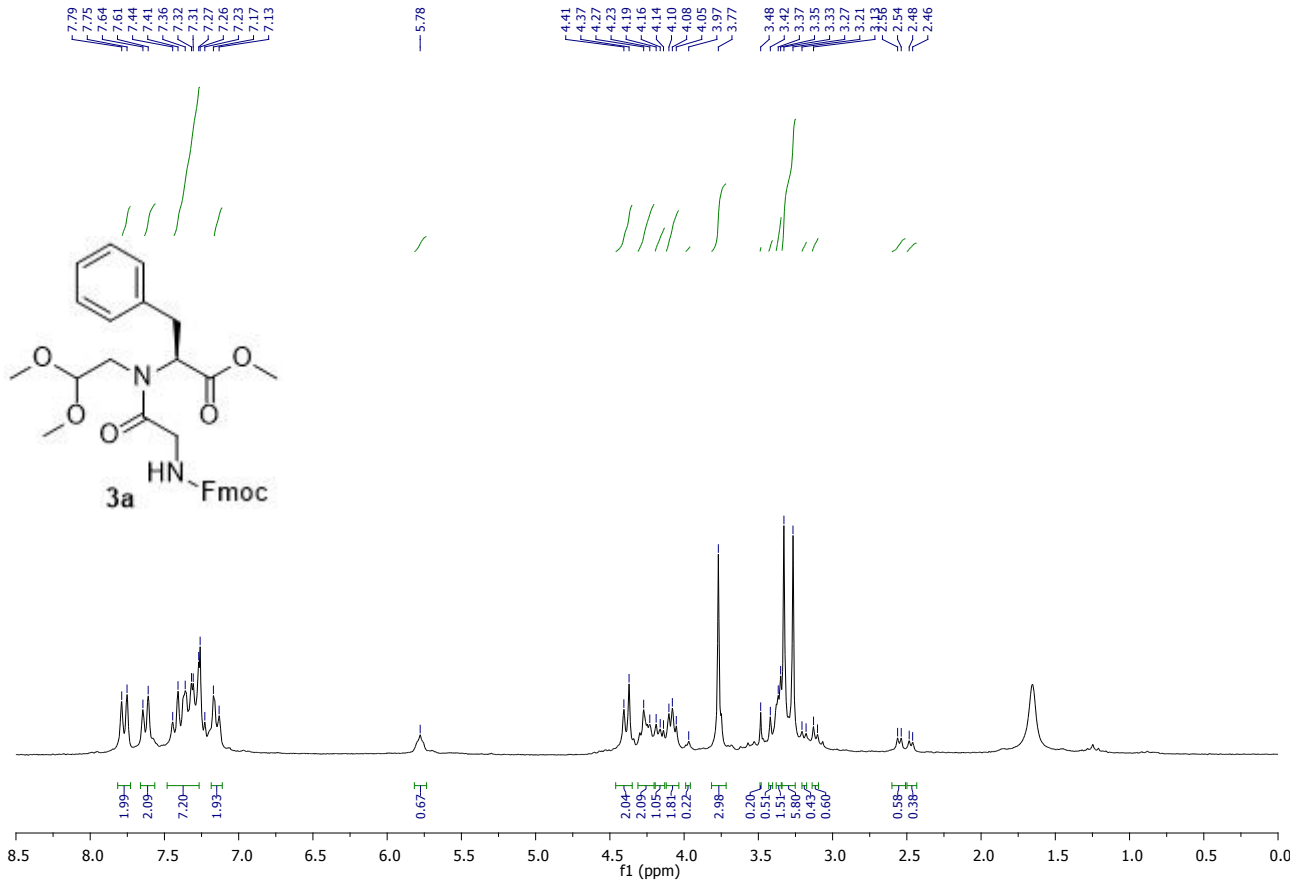

$^{13}\text{C}\{^1\text{H}\}$  NMR (50 MHz,  $\text{CDCl}_3$ )

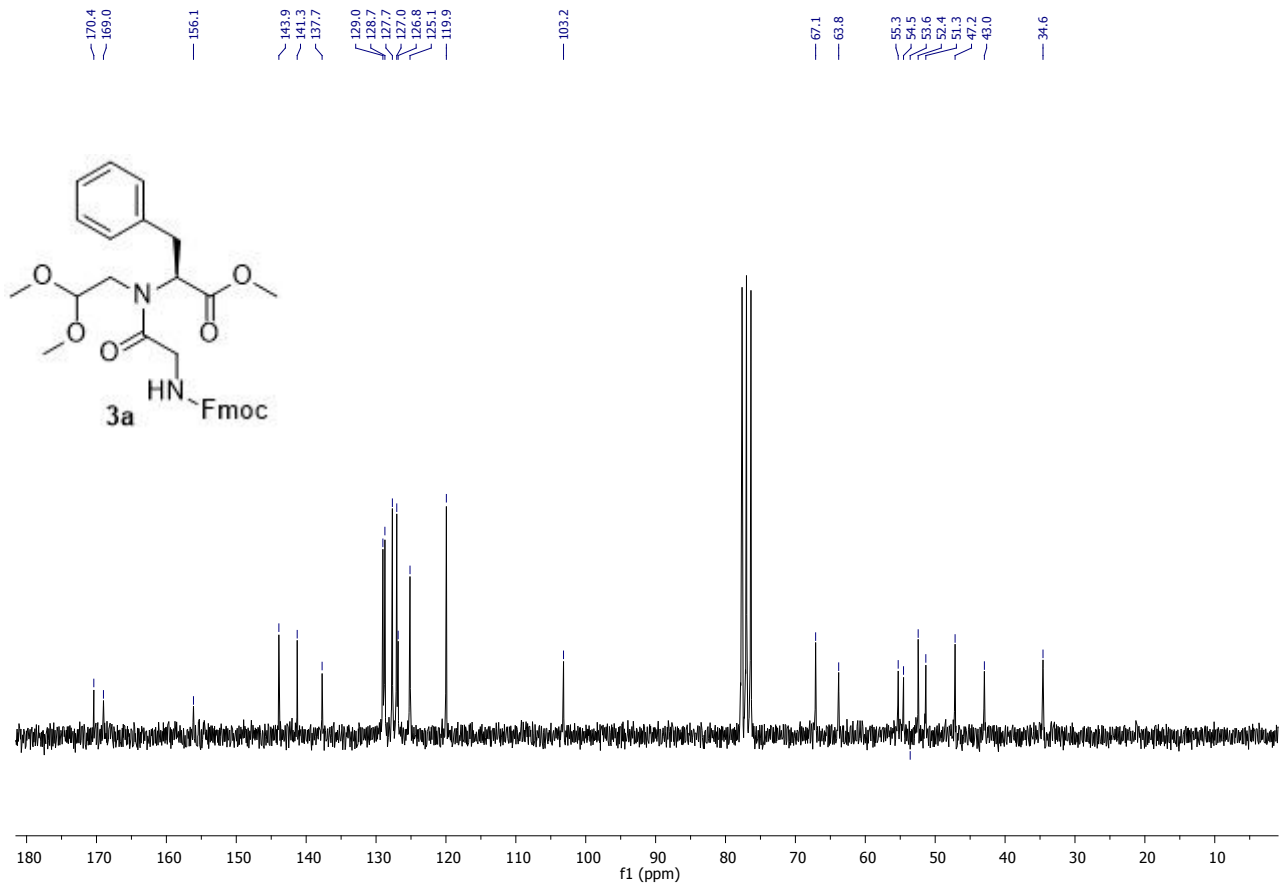

<sup>1</sup>H NMR (400 MHz, CDCl<sub>3</sub>)

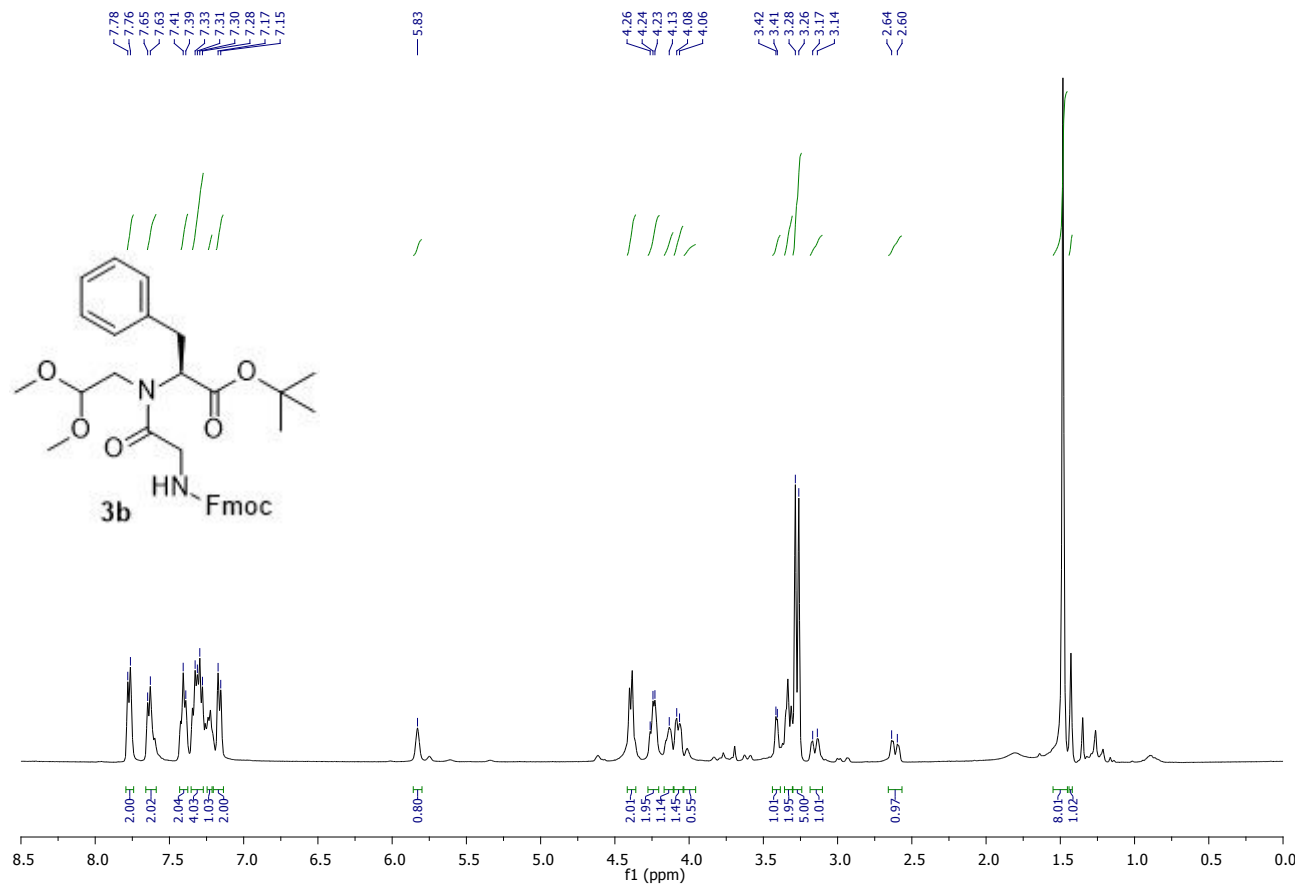

<sup>13</sup>C{<sup>1</sup>H} NMR (100 MHz, CDCl<sub>3</sub>)

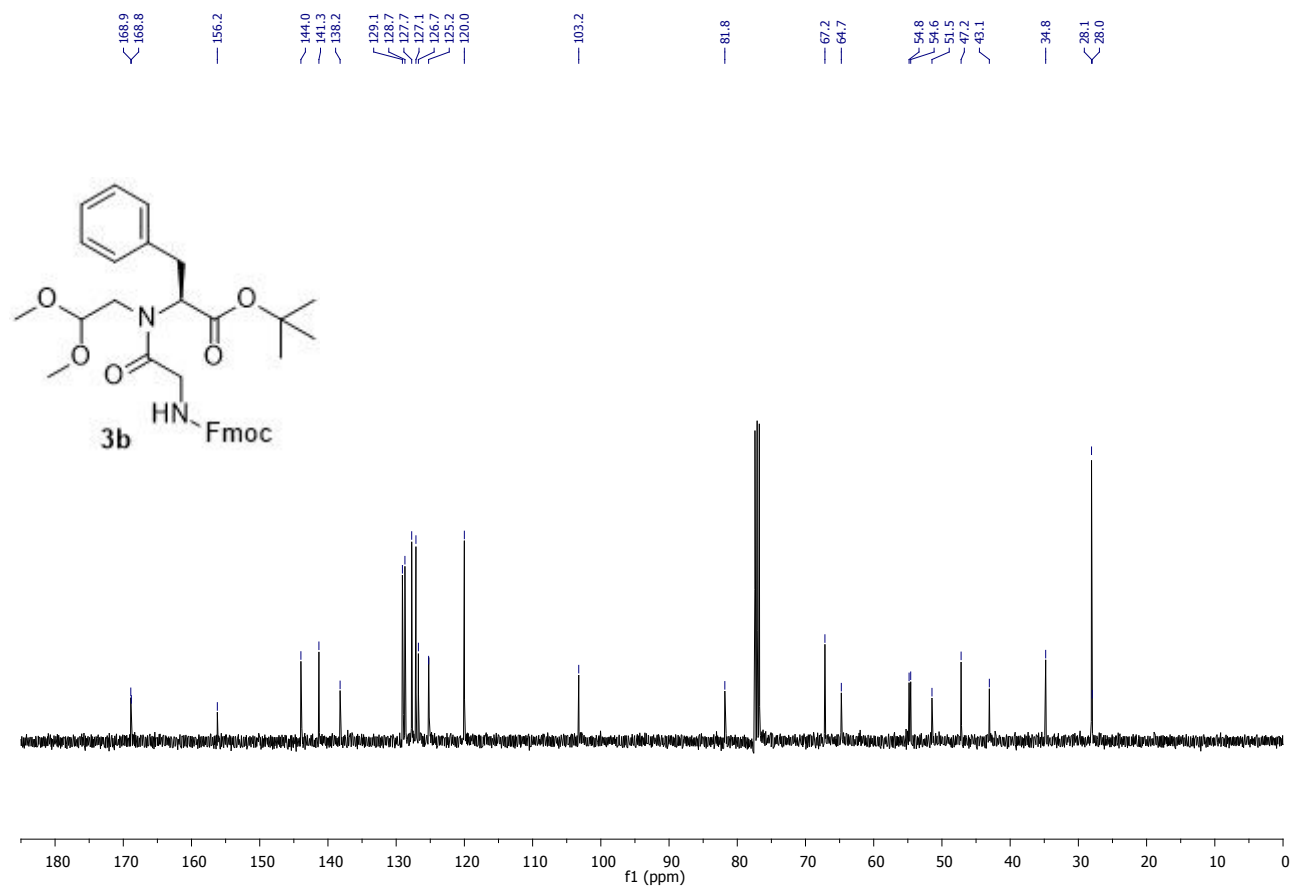

$^1\text{H}$  NMR (200 MHz,  $\text{CDCl}_3$ )

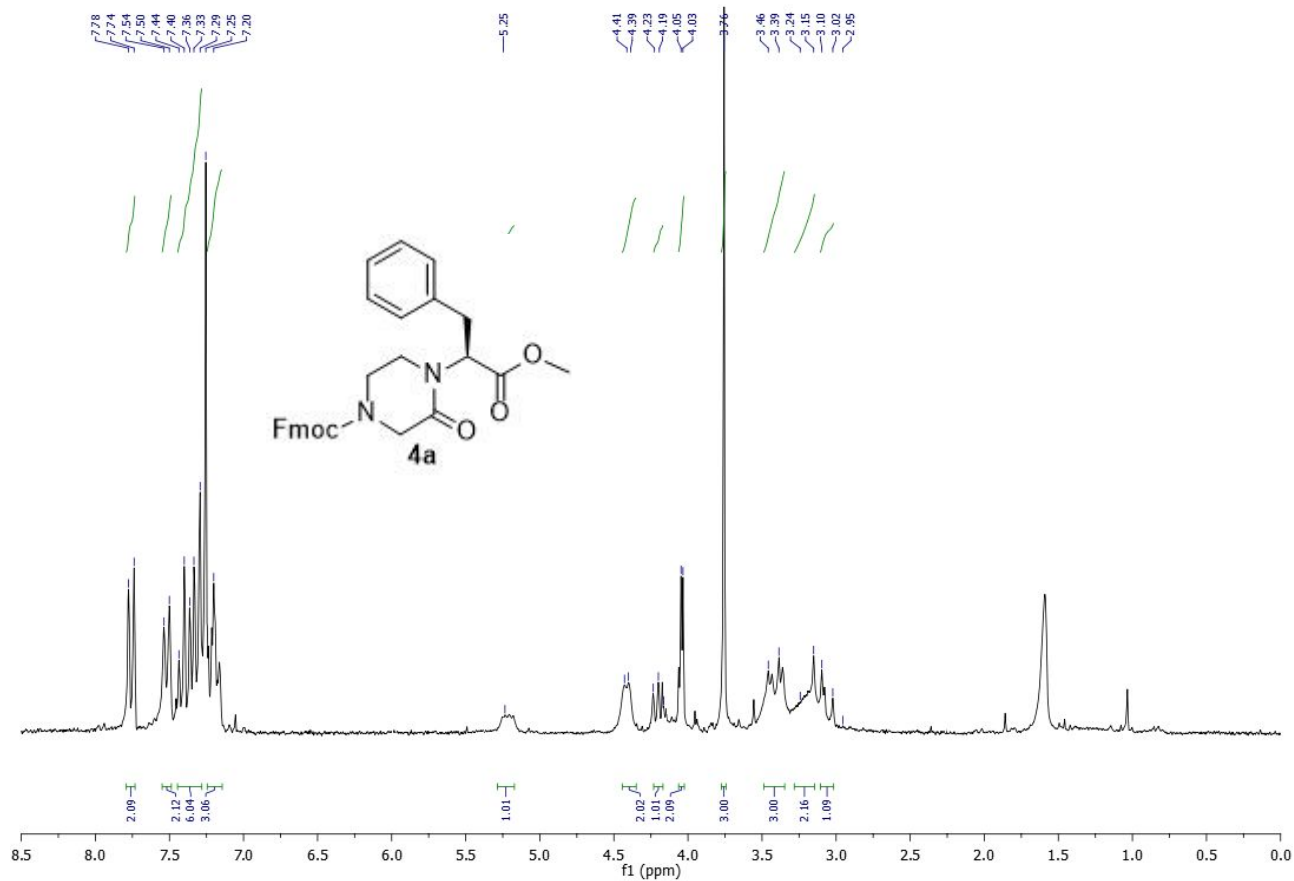

$^{13}\text{C}\{^1\text{H}\}$  NMR (50 MHz,  $\text{CDCl}_3$ )

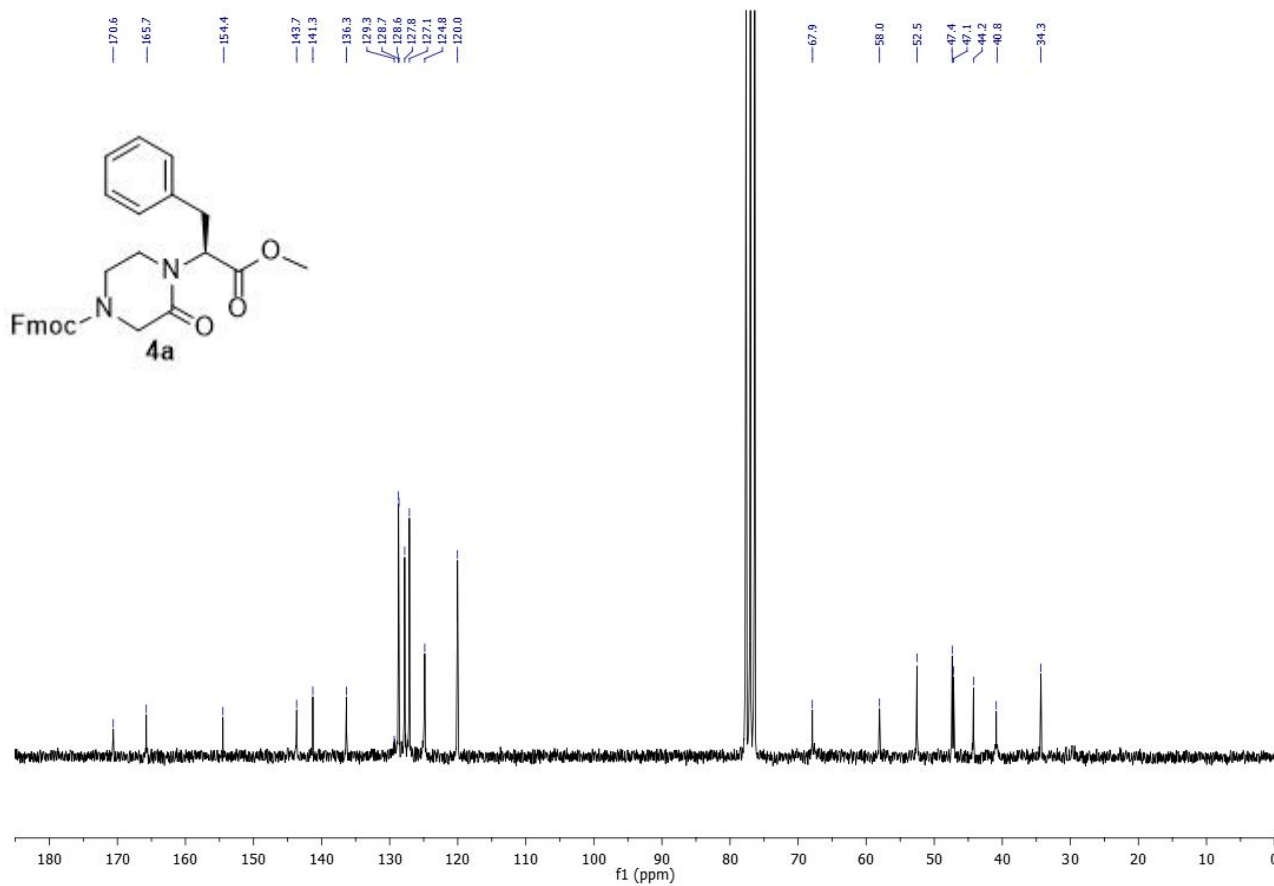

$^1\text{H}$  NMR (200 MHz,  $\text{CDCl}_3$ )

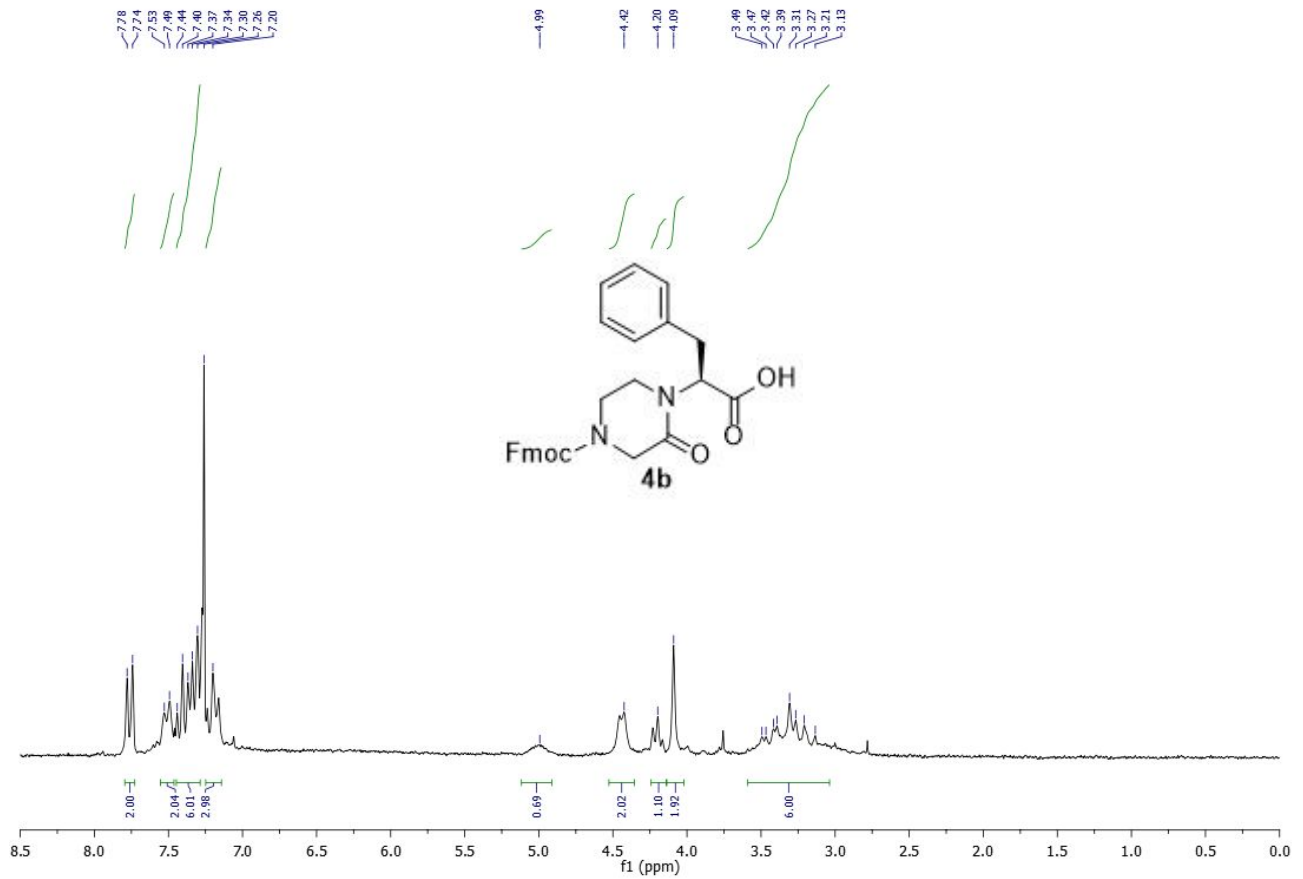

$^{13}\text{C}\{^1\text{H}\}$  NMR (100 MHz,  $\text{CDCl}_3$ )

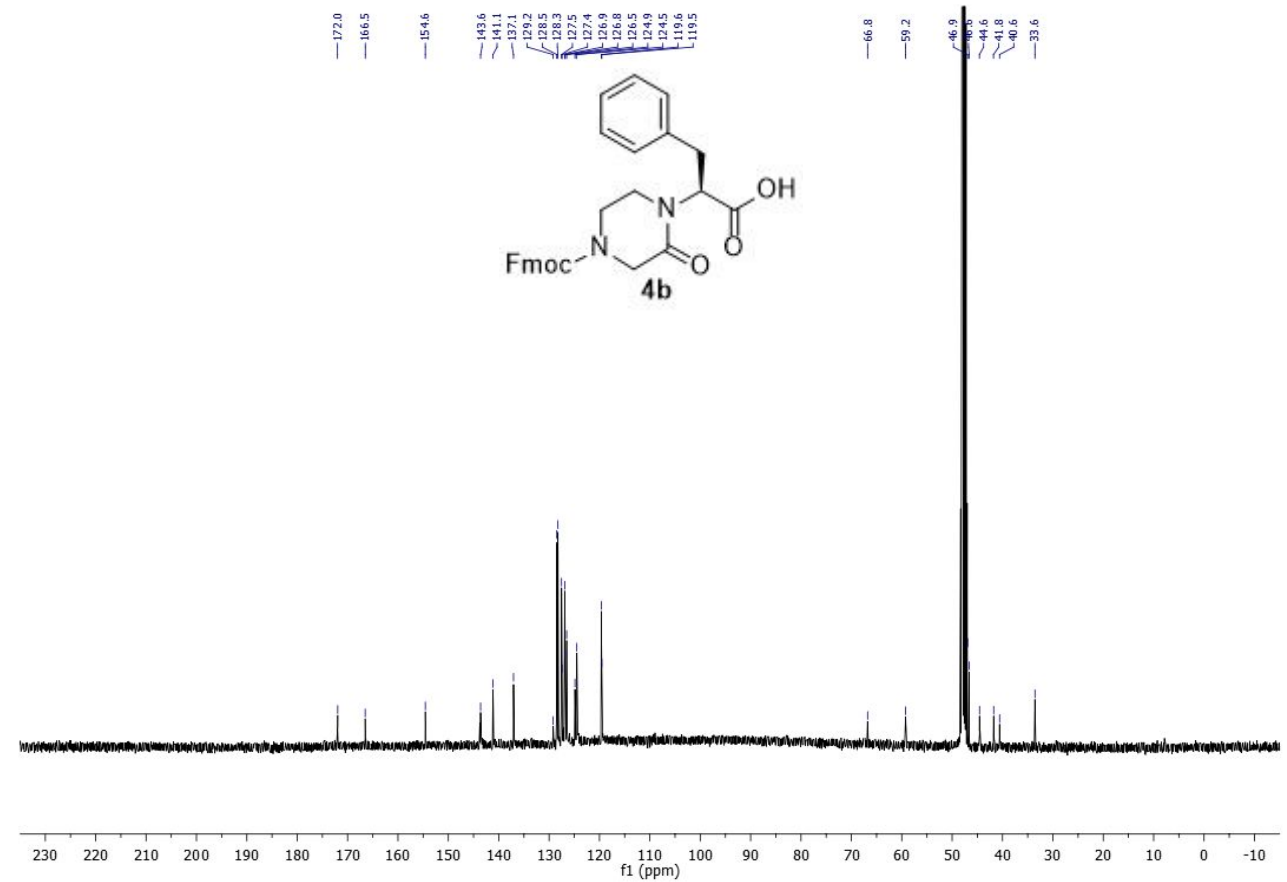

$^1\text{H}$  NMR (400 MHz,  $\text{CDCl}_3$ )

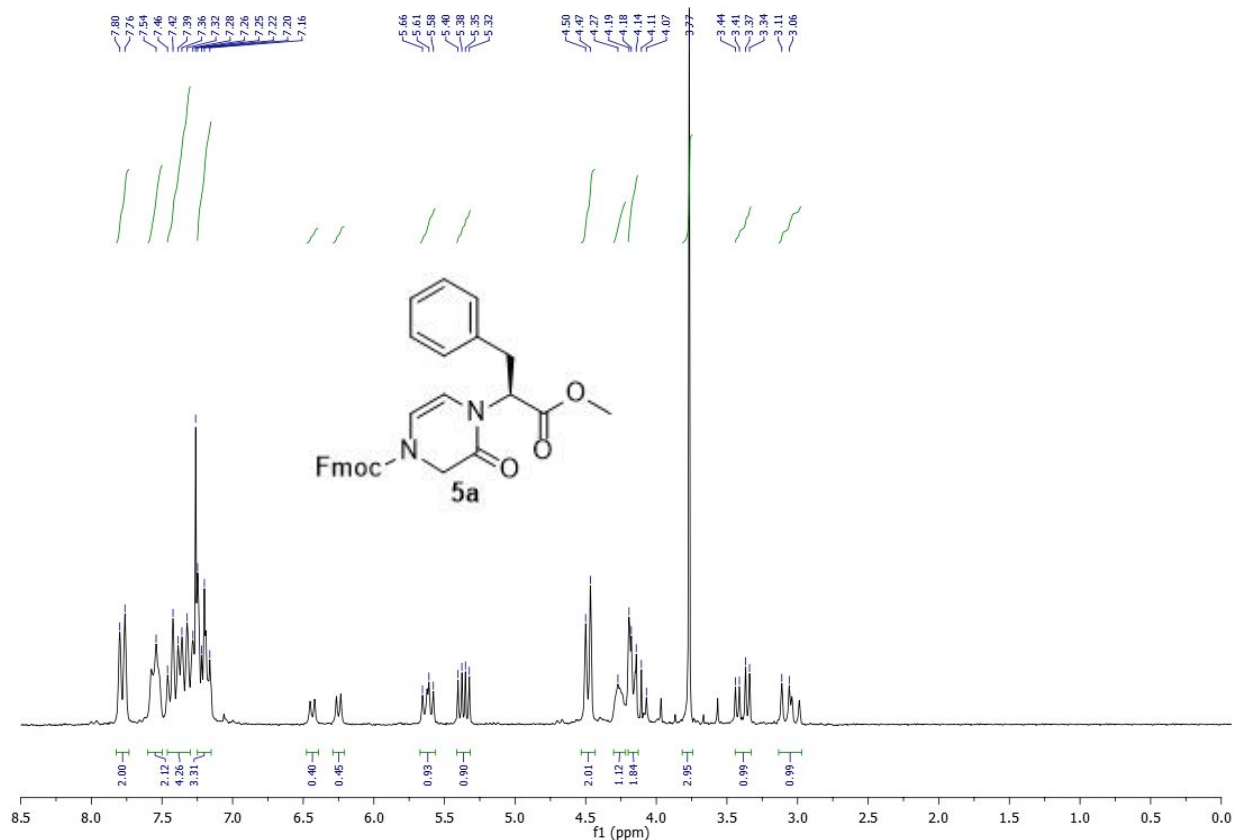

$^{13}\text{C}\{^1\text{H}\}$  NMR (100 MHz,  $\text{CDCl}_3$ )

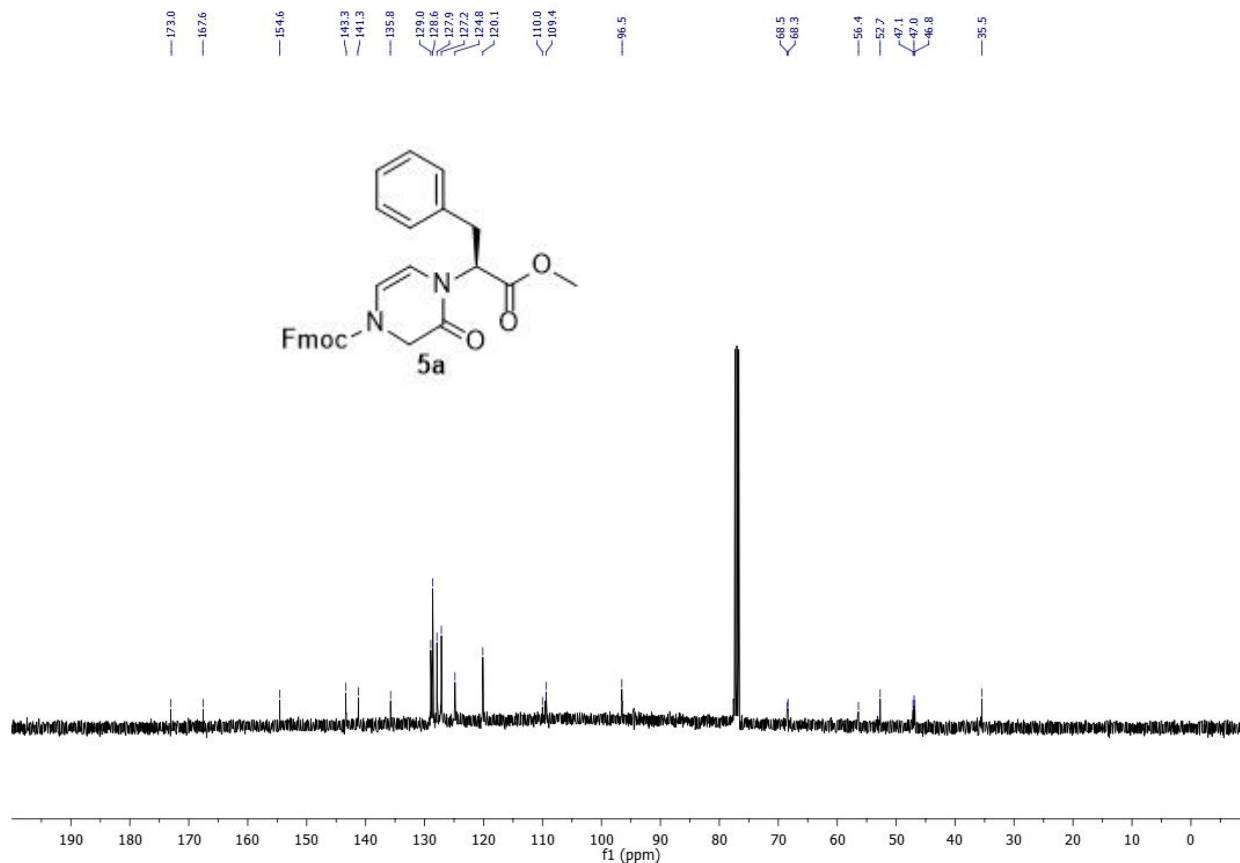



$^1\text{H}$  NMR (400 MHz,  $\text{CDCl}_3$ )

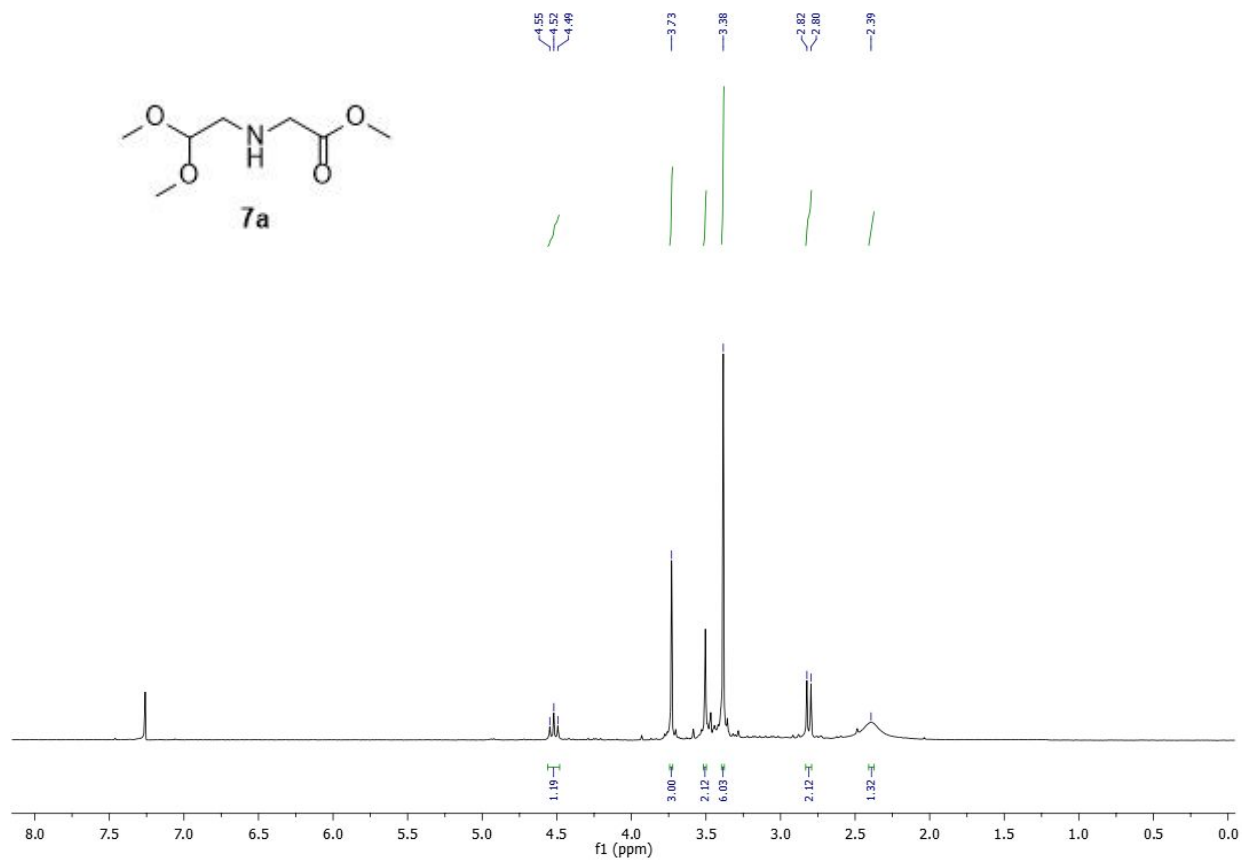

$^1\text{H}$  NMR (400 MHz,  $\text{CDCl}_3$ )

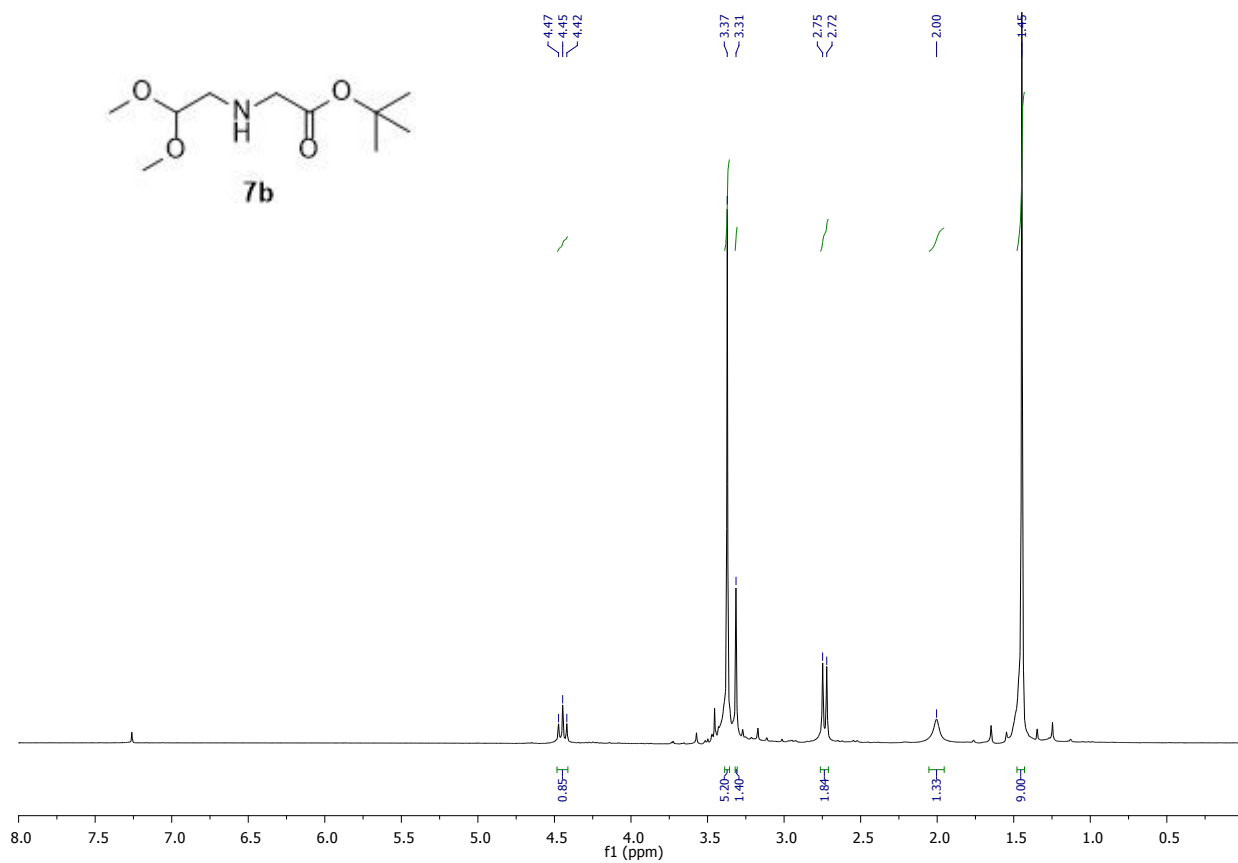

$^1\text{H}$  NMR (400 MHz,  $\text{CDCl}_3$ )

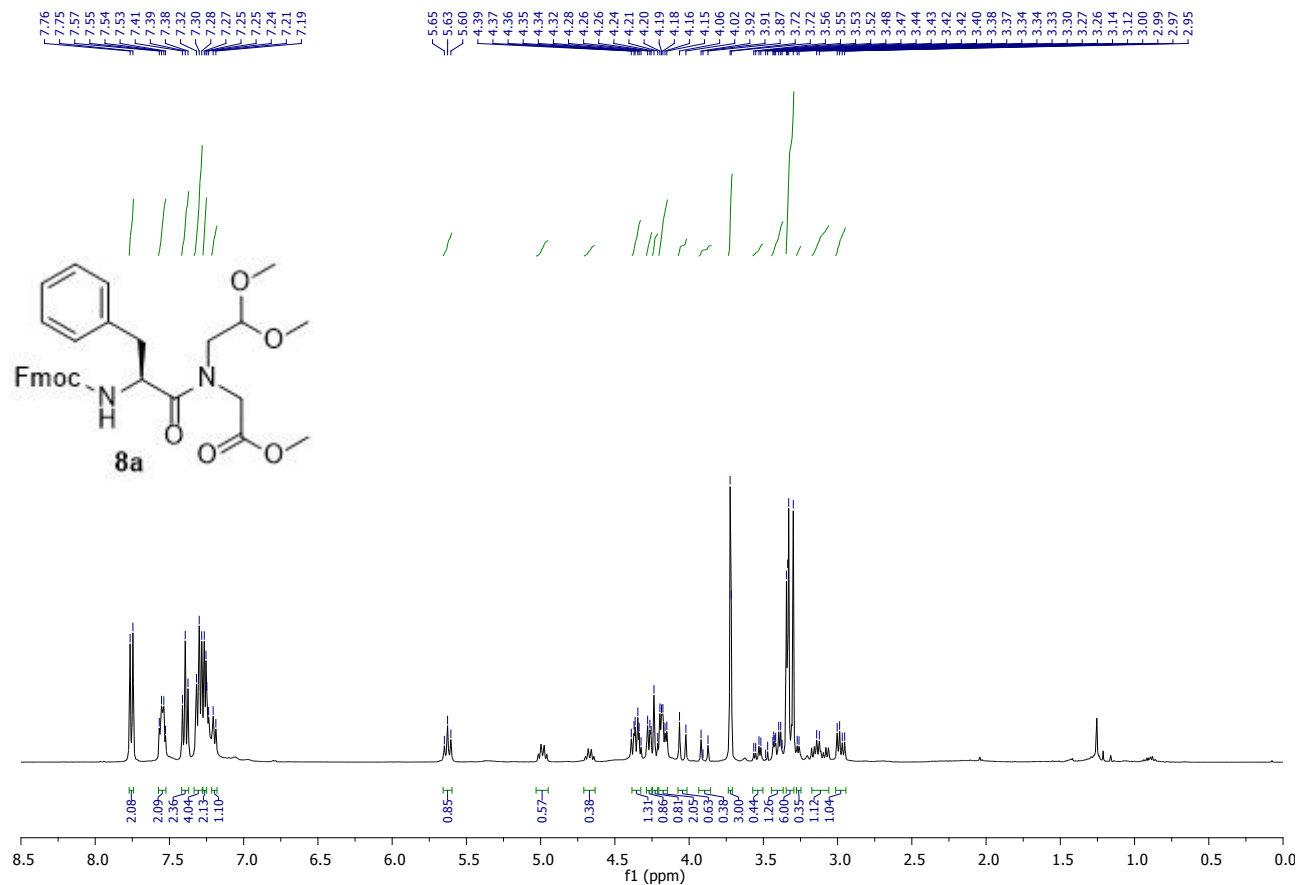

$^{13}\text{C}\{^1\text{H}\}$  NMR (100 MHz,  $\text{CDCl}_3$ )

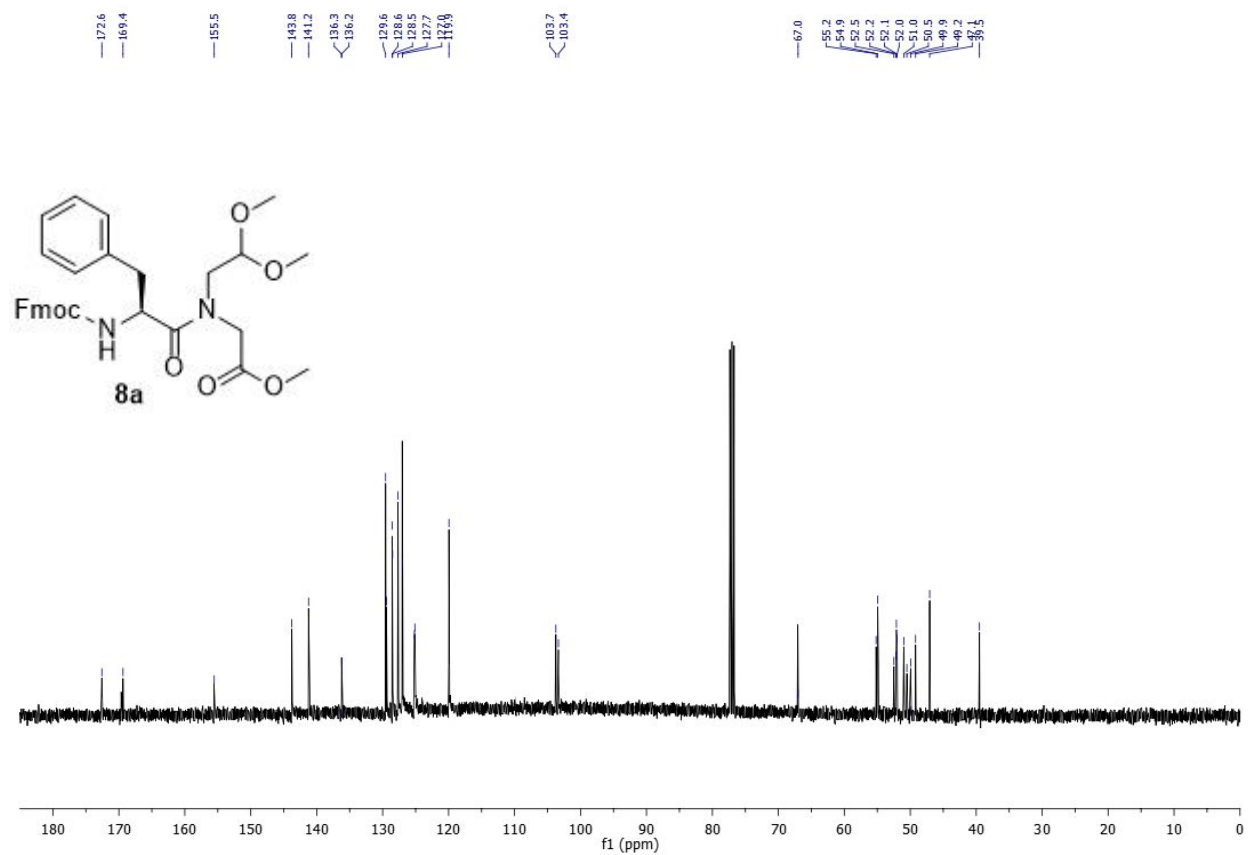

$^1\text{H}$  NMR (400 MHz,  $\text{CDCl}_3$ )

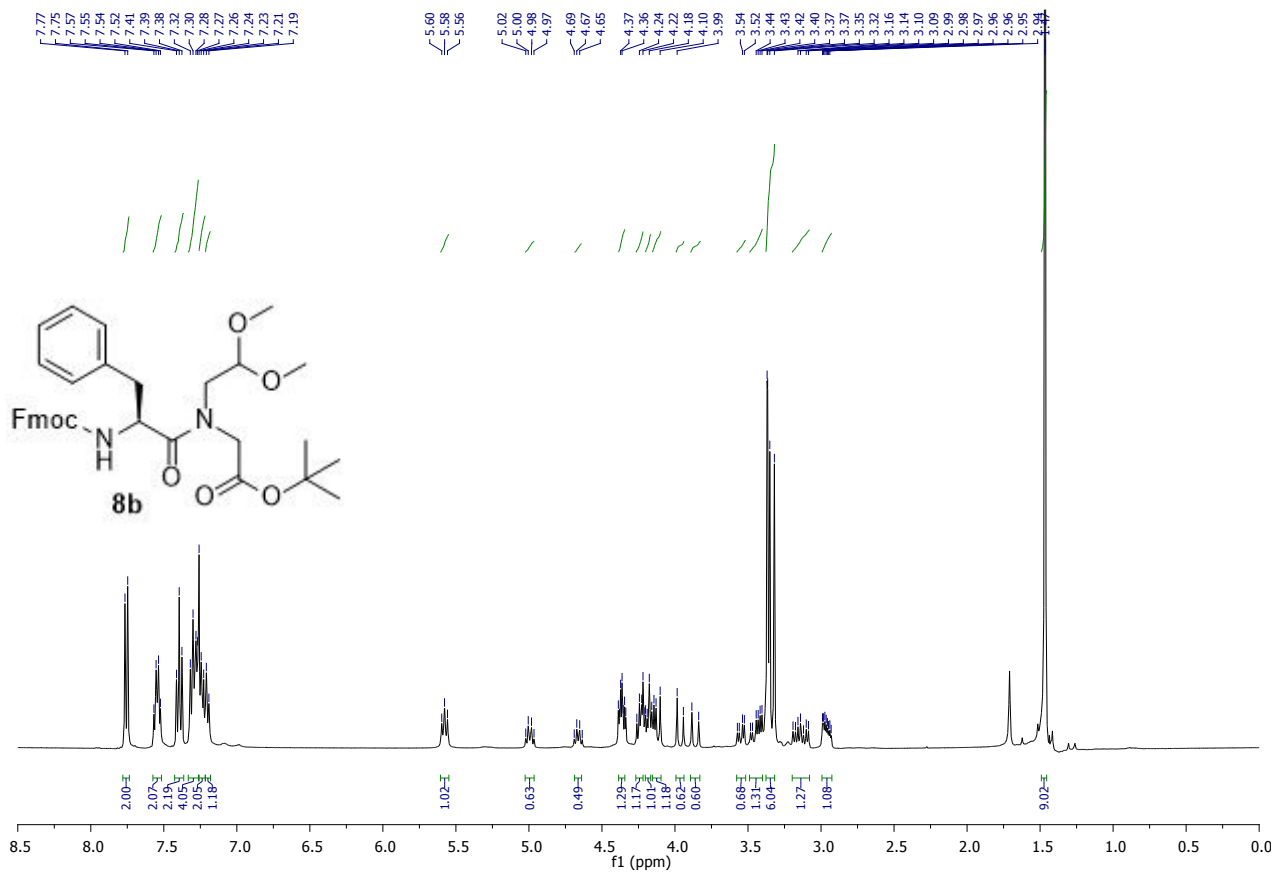

$^{13}\text{C}\{^1\text{H}\}$  NMR (100 MHz,  $\text{CDCl}_3$ )

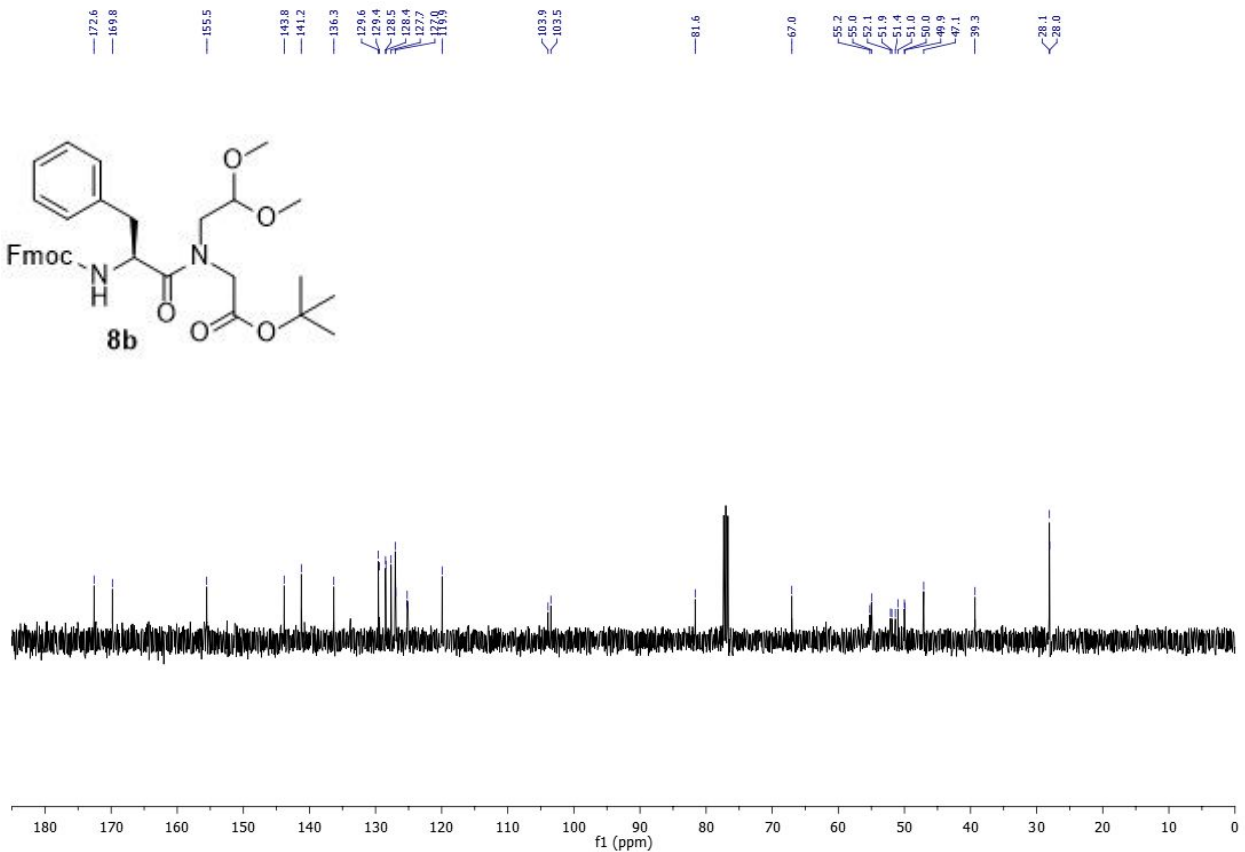

$^1\text{H}$  NMR (400 MHz,  $\text{CDCl}_3$ )

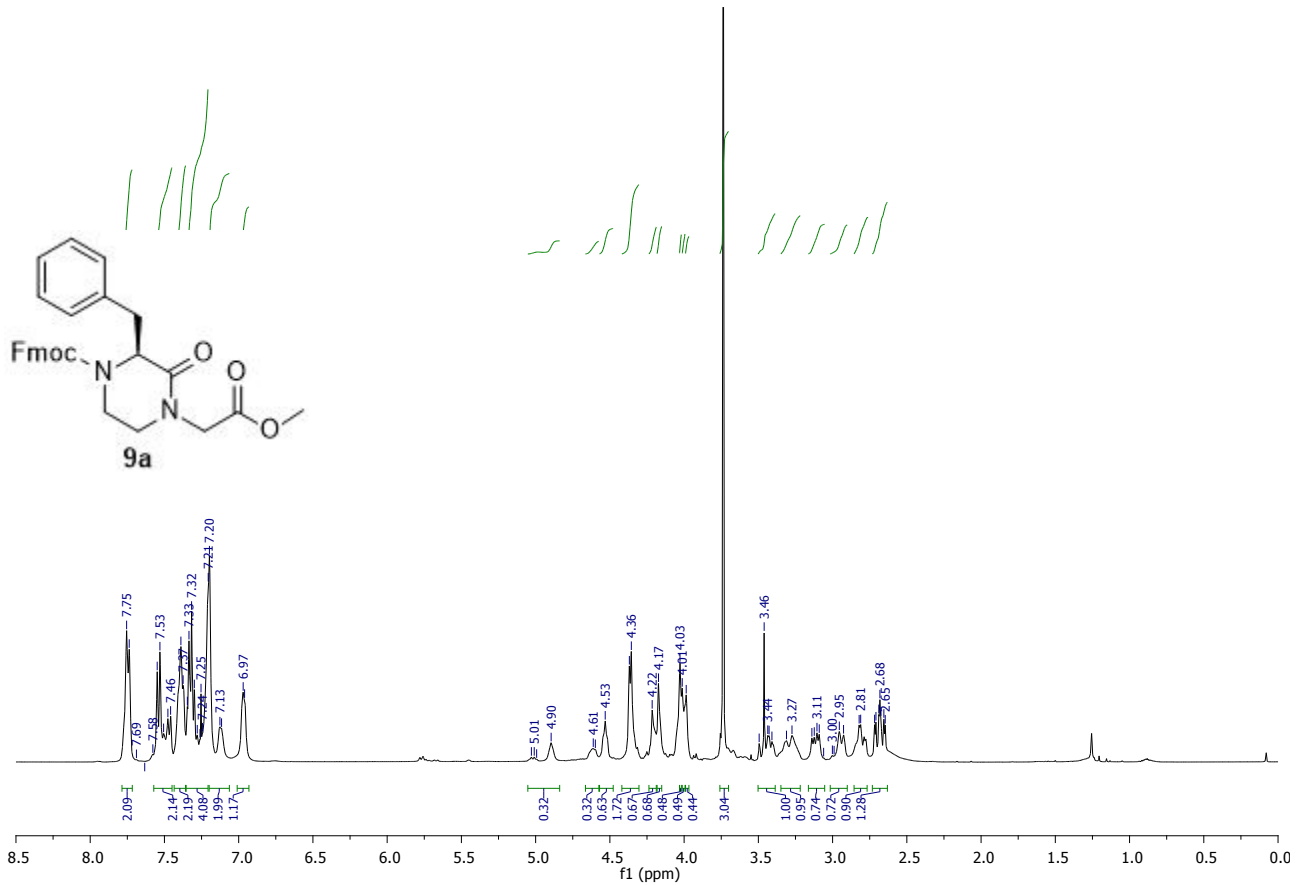

$^{13}\text{C}\{^1\text{H}\}$  NMR (100 MHz,  $\text{CDCl}_3$ )

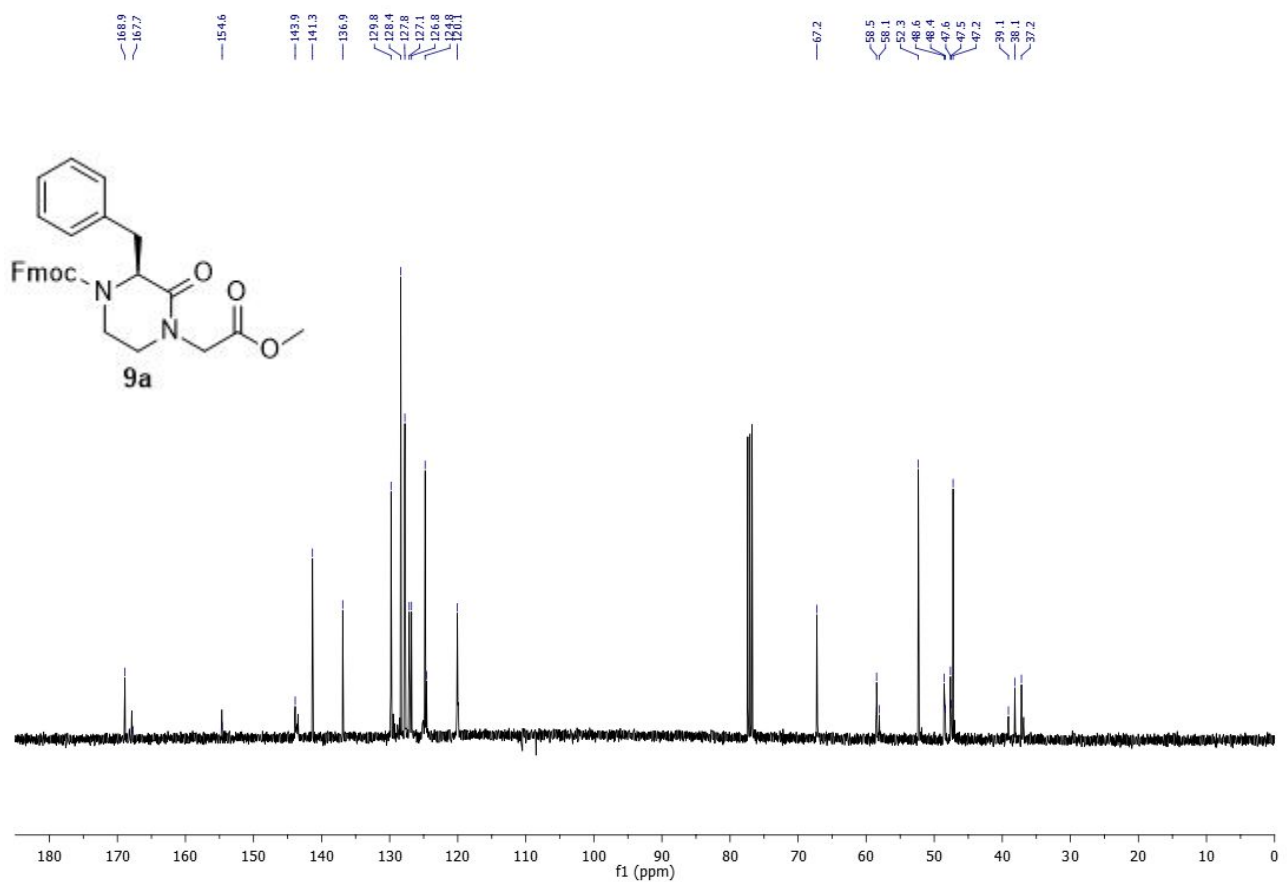

$^1\text{H}$  NMR (400 MHz,  $\text{CDCl}_3$ )

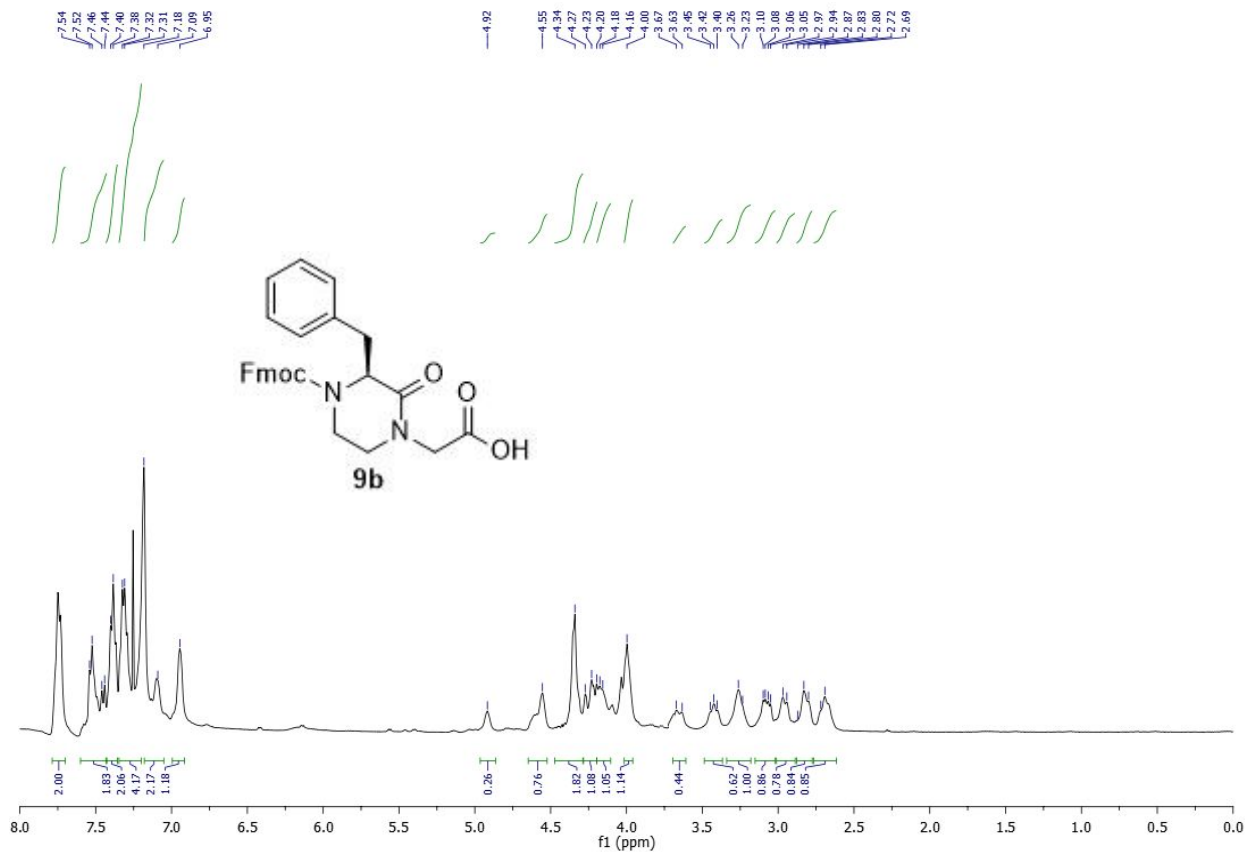

$^{13}\text{C}\{^1\text{H}\}$  NMR (100 MHz,  $\text{CDCl}_3$ )

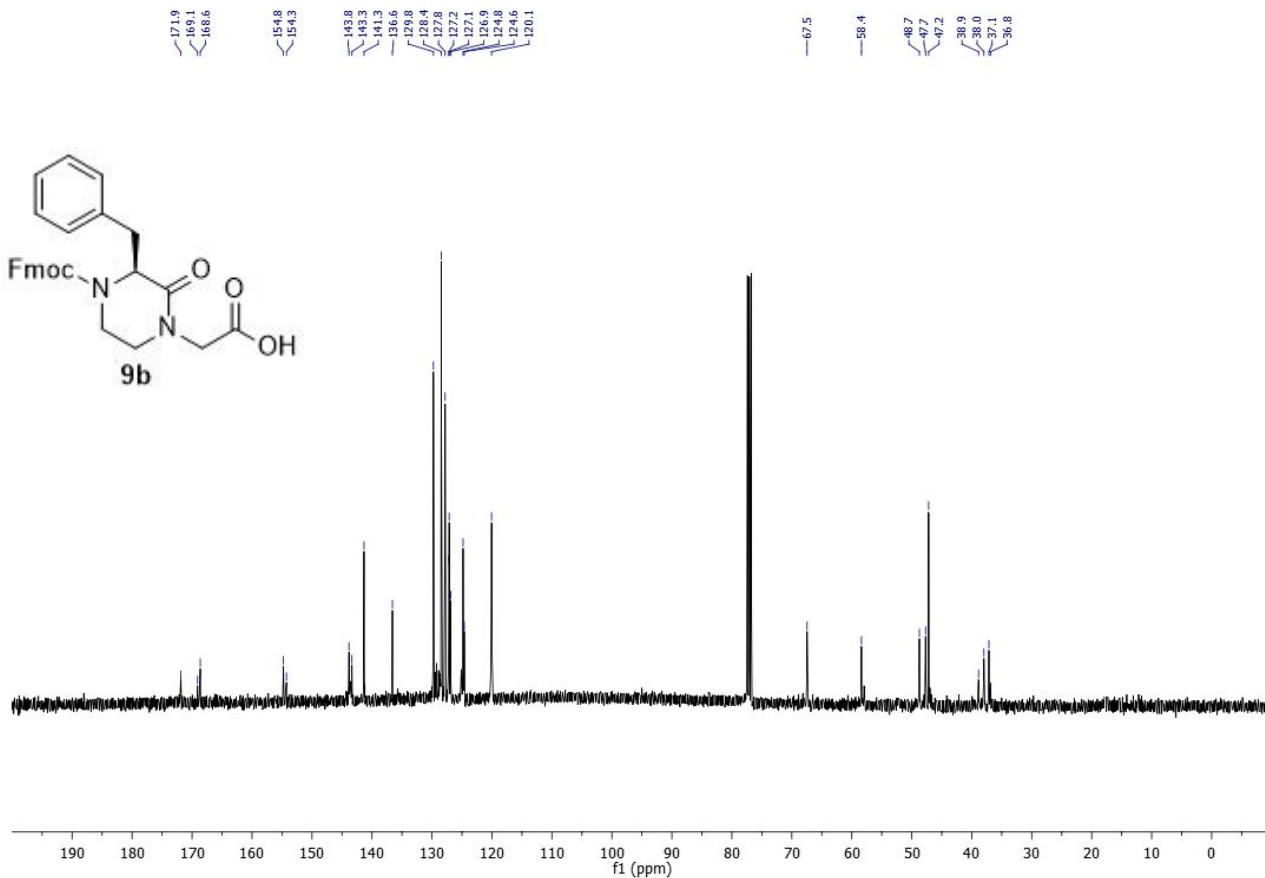

$^1\text{H}$  NMR (400 MHz,  $\text{CDCl}_3$ )

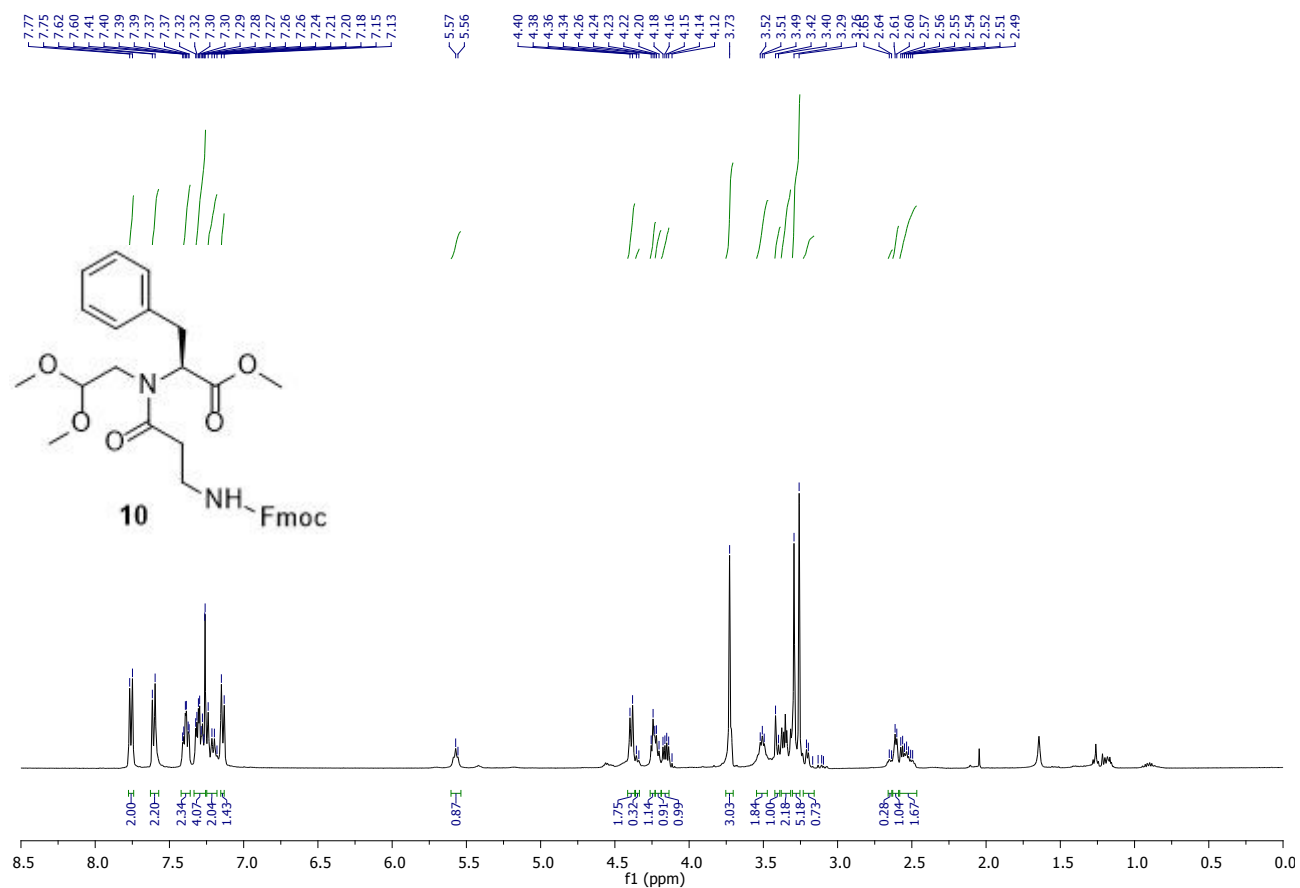

$^{13}\text{C}\{^1\text{H}\}$  NMR (100 MHz,  $\text{CDCl}_3$ )

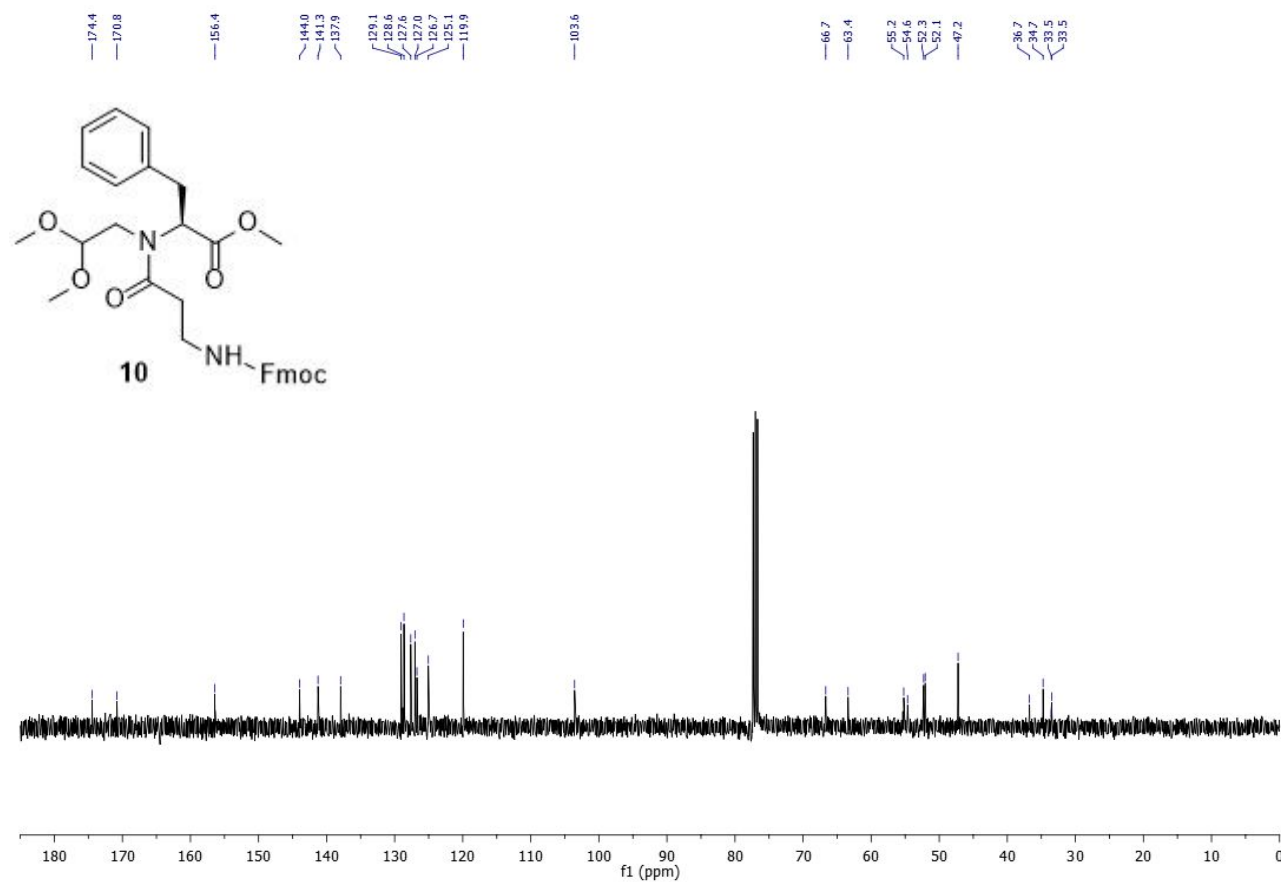

$^1\text{H}$  NMR (400 MHz,  $\text{CDCl}_3$ )

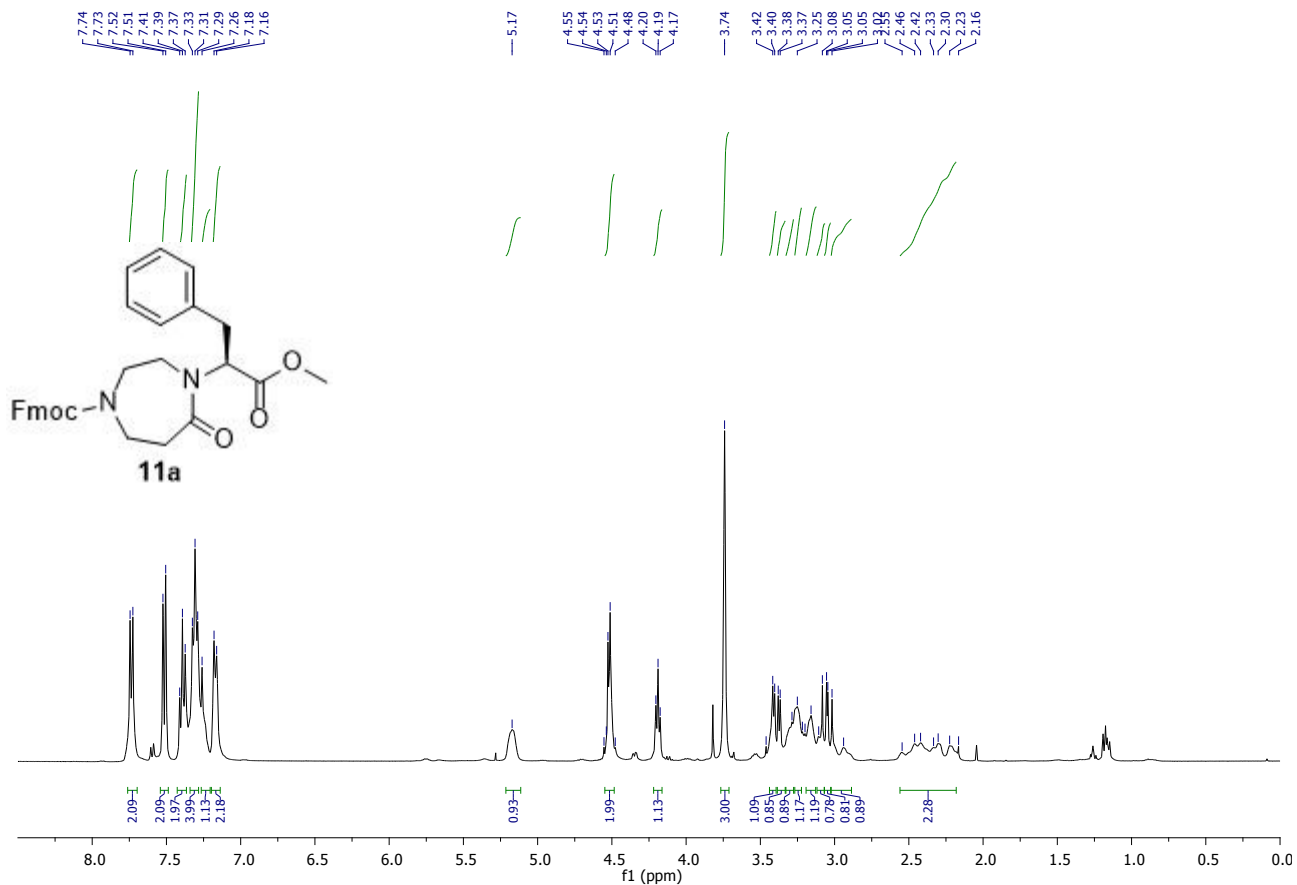

$^{13}\text{C}\{^1\text{H}\}$  NMR (50 MHz,  $\text{CDCl}_3$ )

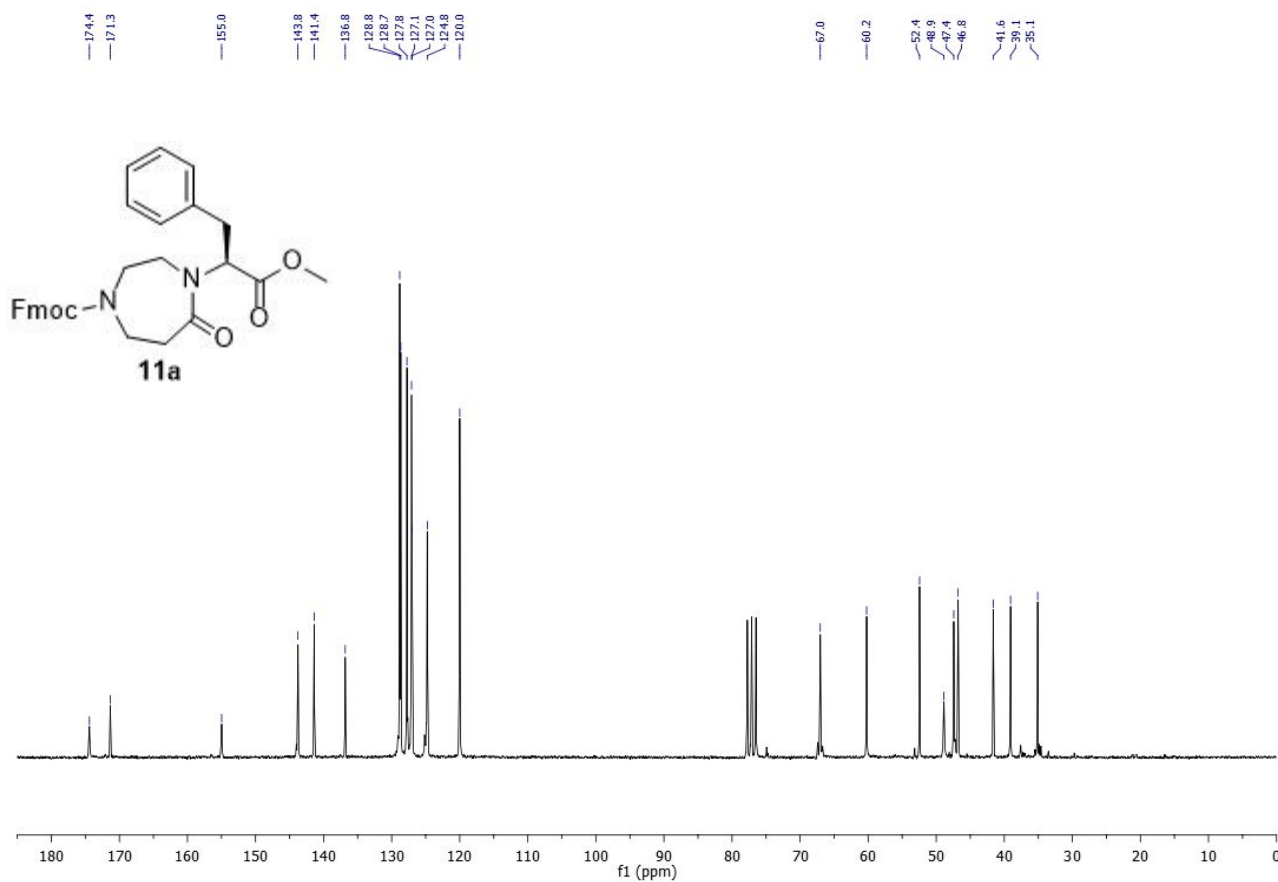

$^1\text{H}$  NMR (400 MHz,  $\text{CDCl}_3$ )

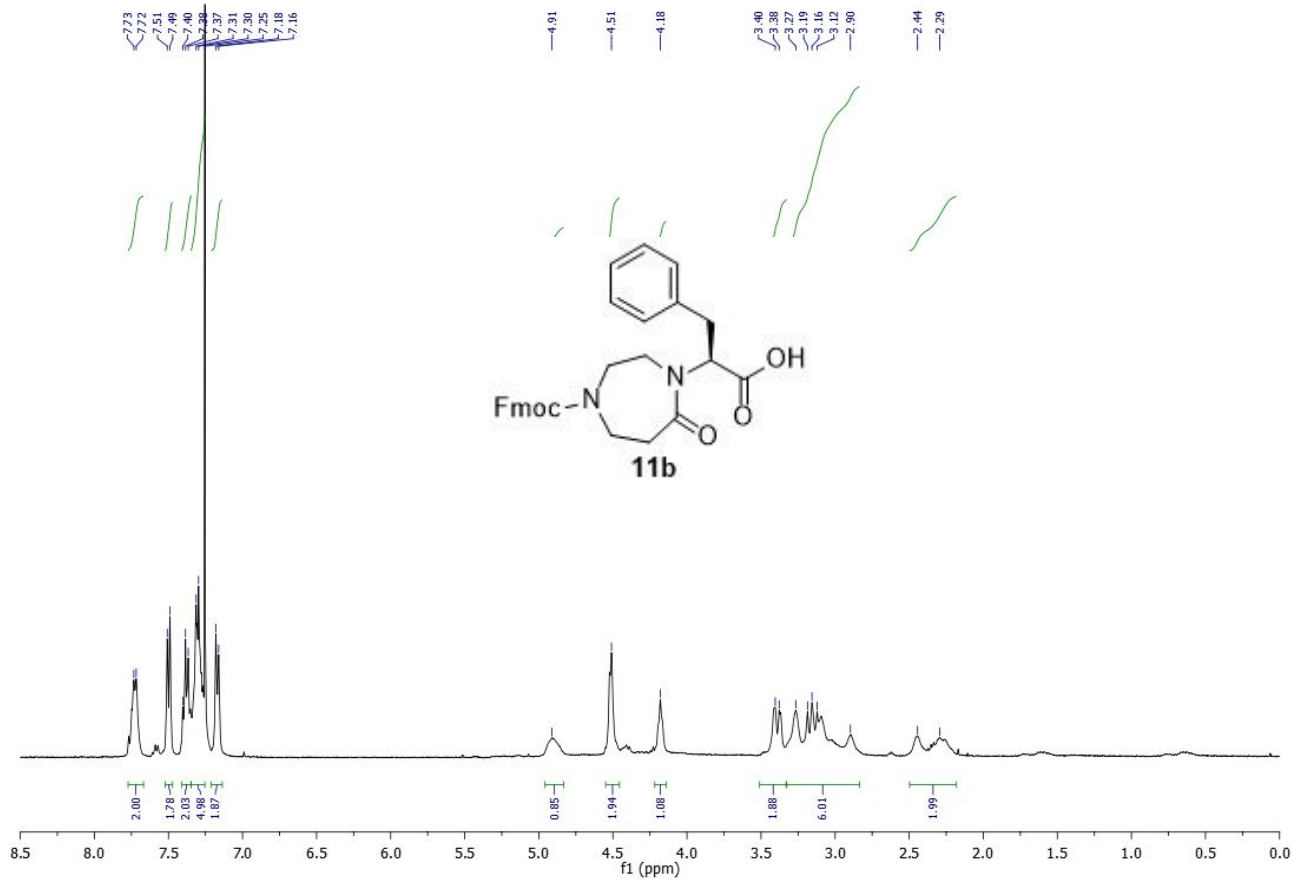

$^{13}\text{C}\{^1\text{H}\}$  NMR (50 MHz,  $\text{CDCl}_3$ )

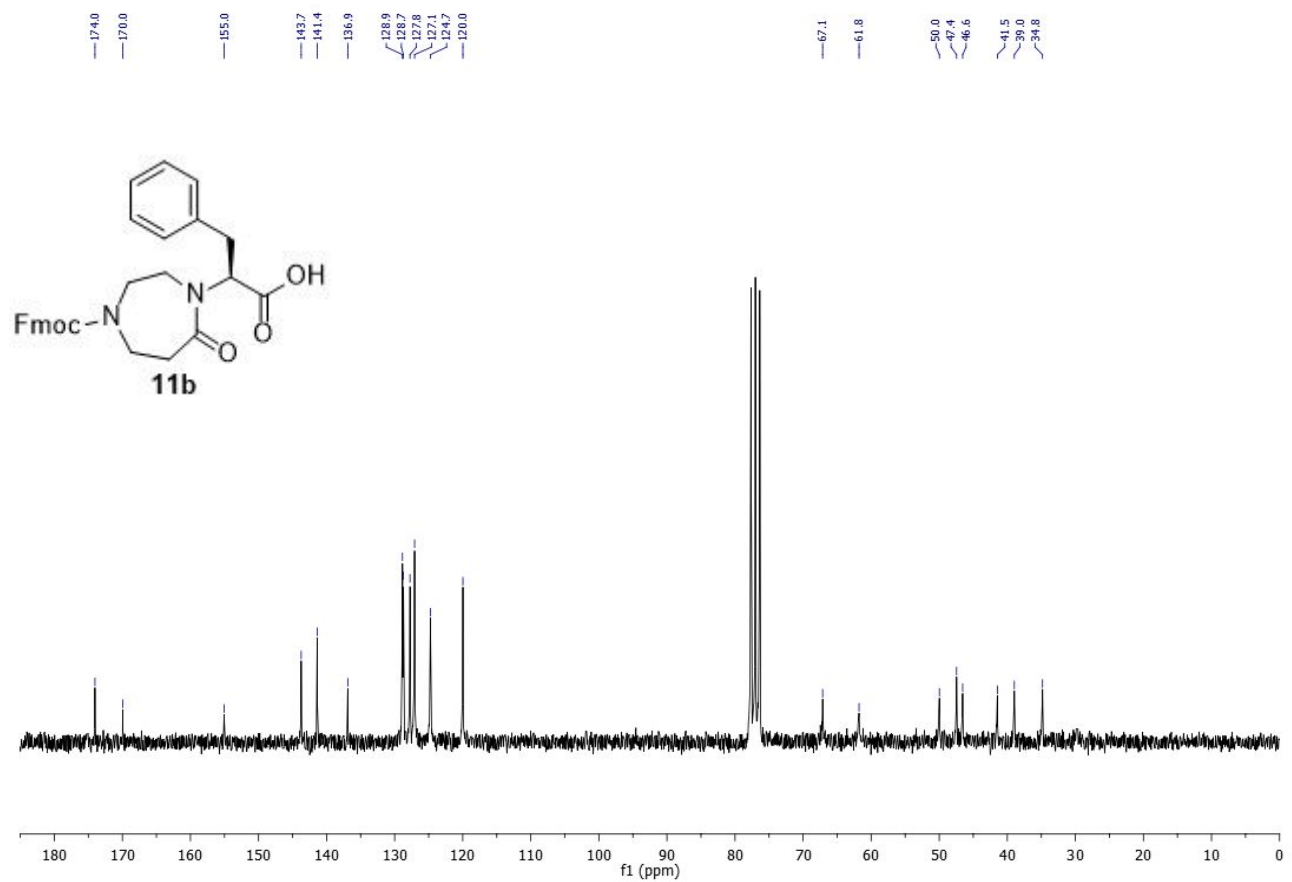



$^1\text{H}$  NMR (400 MHz,  $\text{CDCl}_3$ )

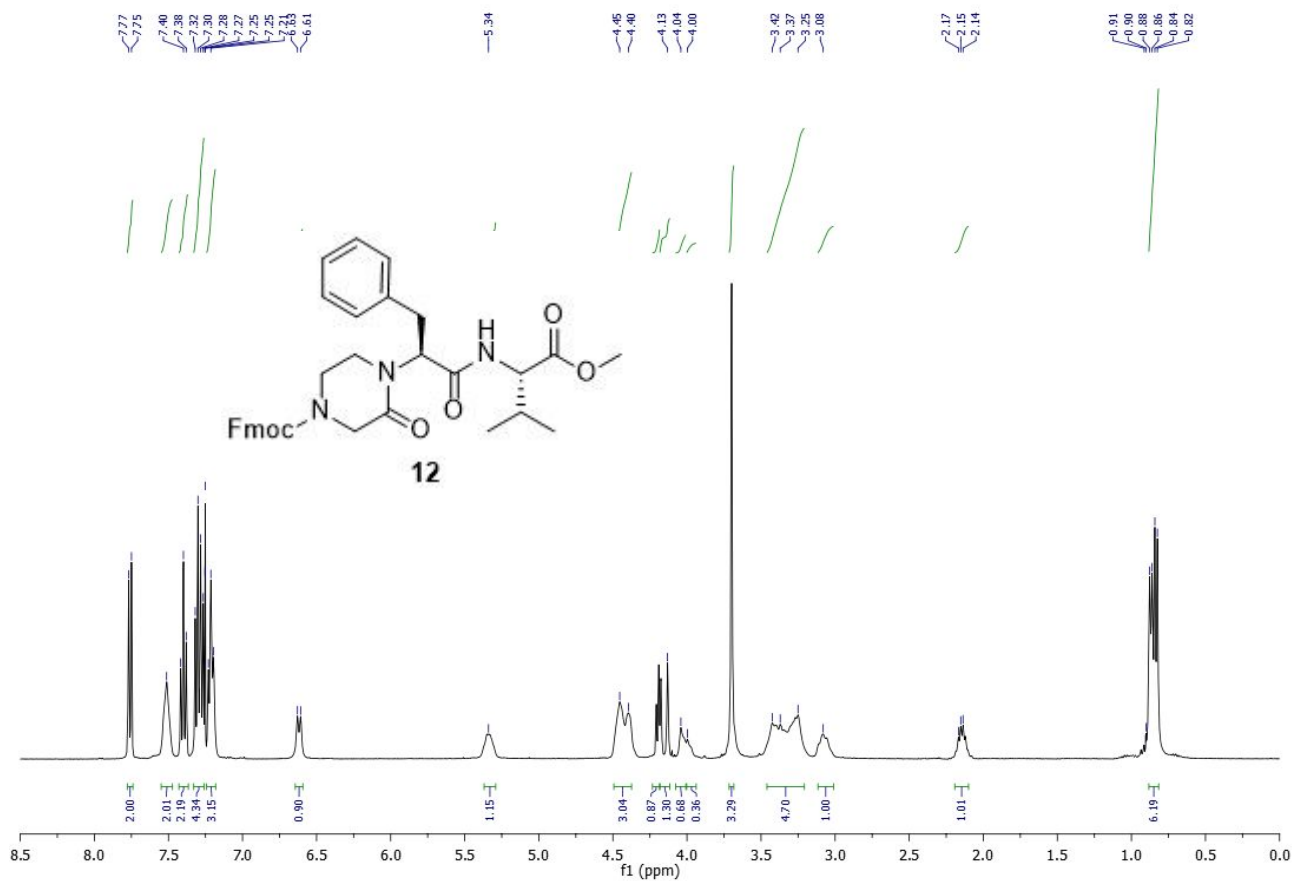

$^{13}\text{C}\{^1\text{H}\}$  NMR (100 MHz,  $\text{CDCl}_3$ )

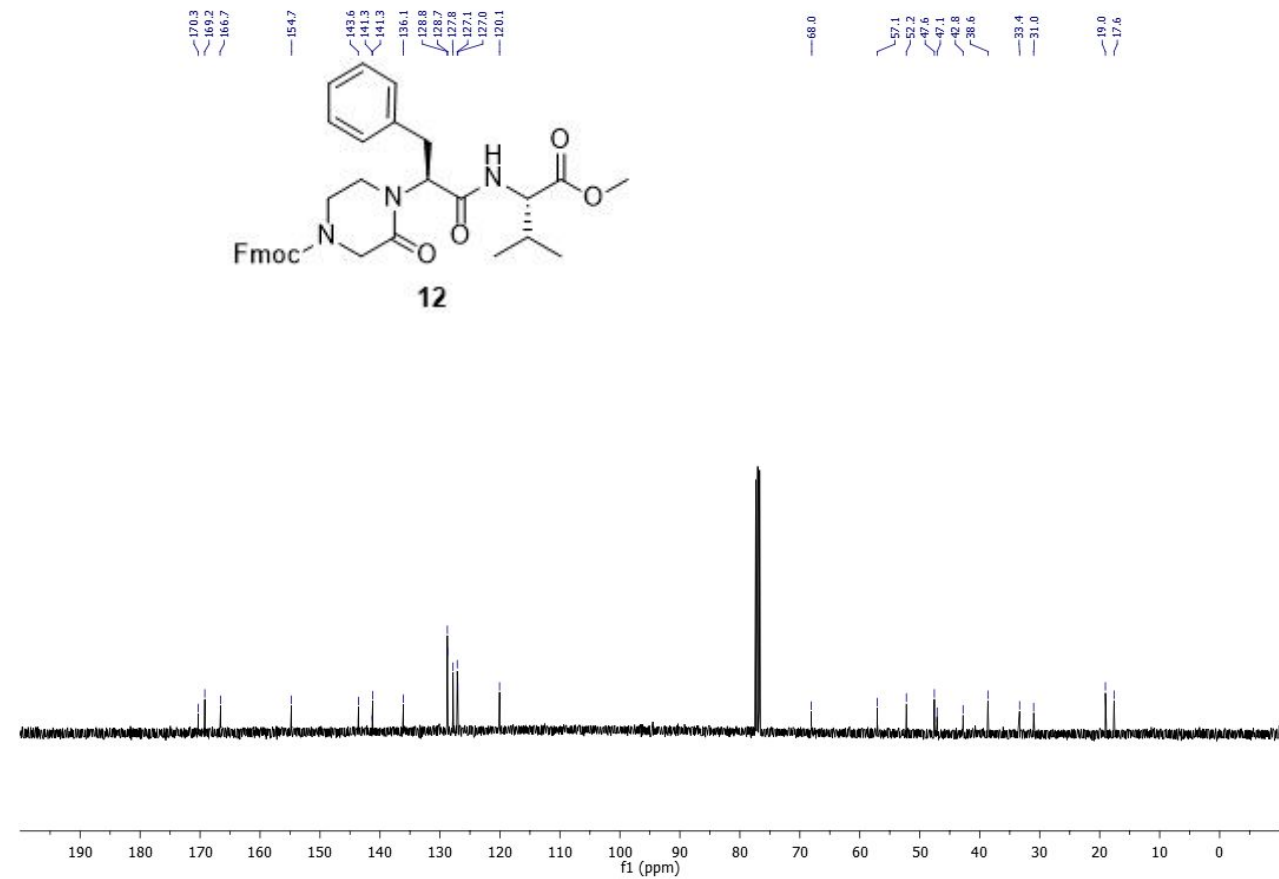

$^1\text{H}$  NMR (400 MHz,  $\text{CDCl}_3$ )

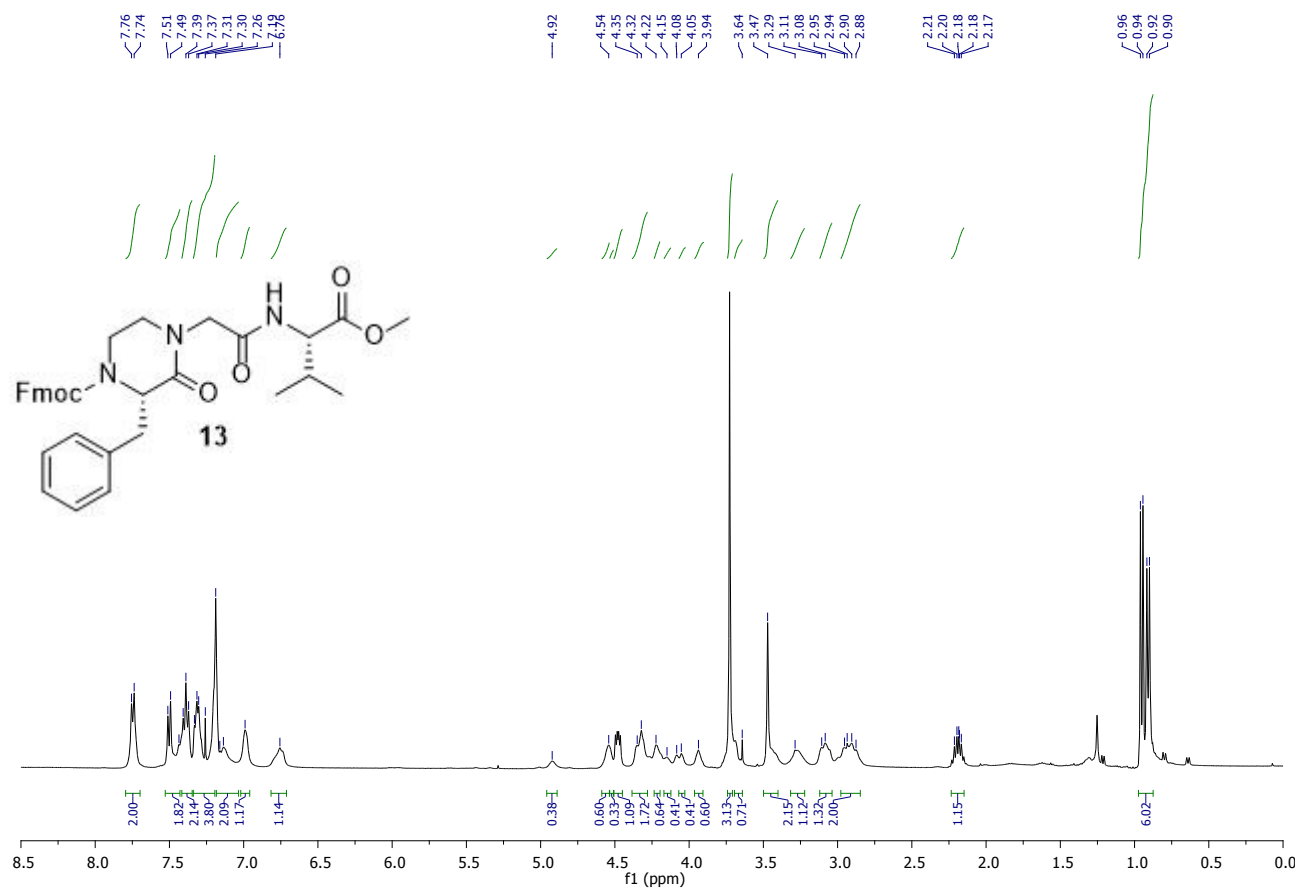

$^{13}\text{C}\{^1\text{H}\}$  NMR (100 MHz,  $\text{CDCl}_3$ )

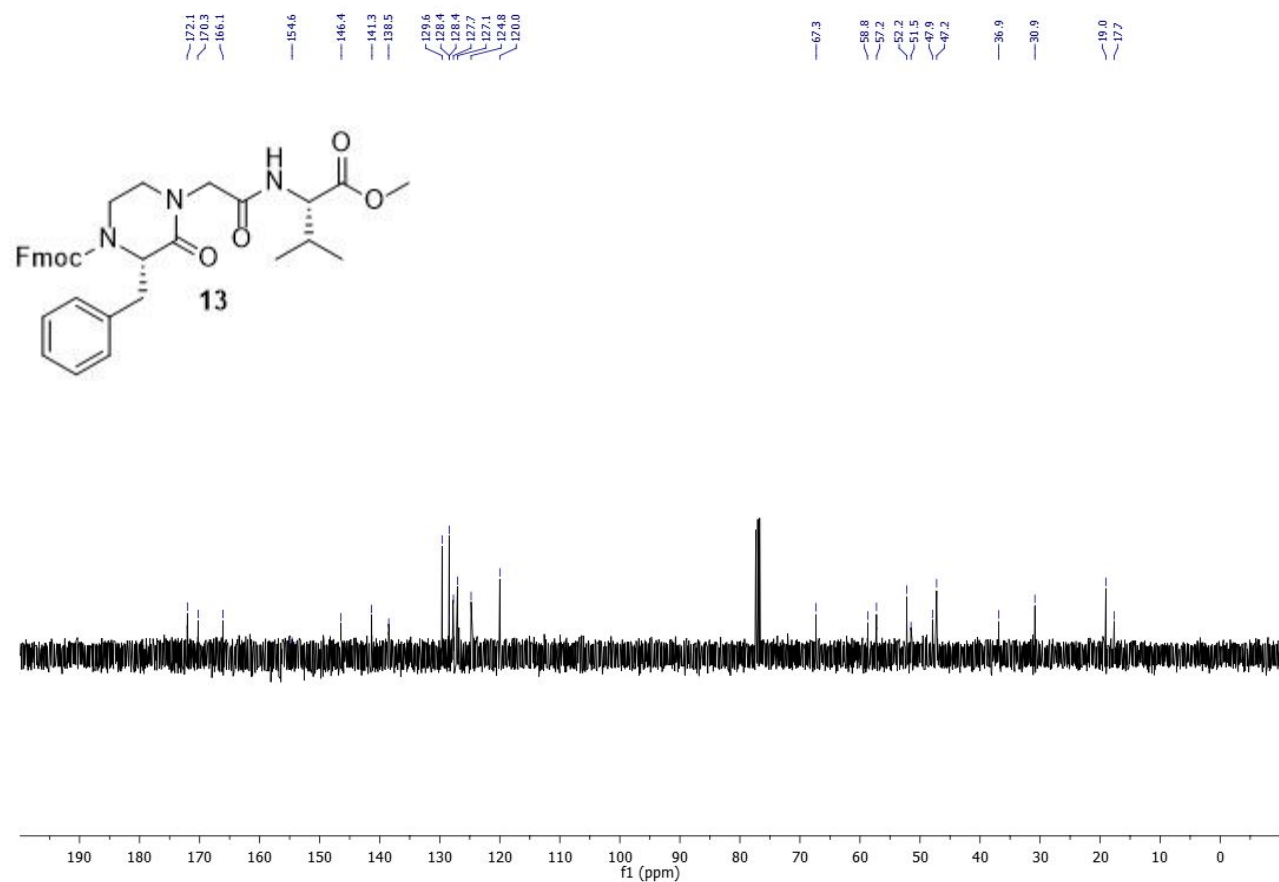

$^1\text{H}$  NMR (400 MHz,  $\text{CDCl}_3$ )

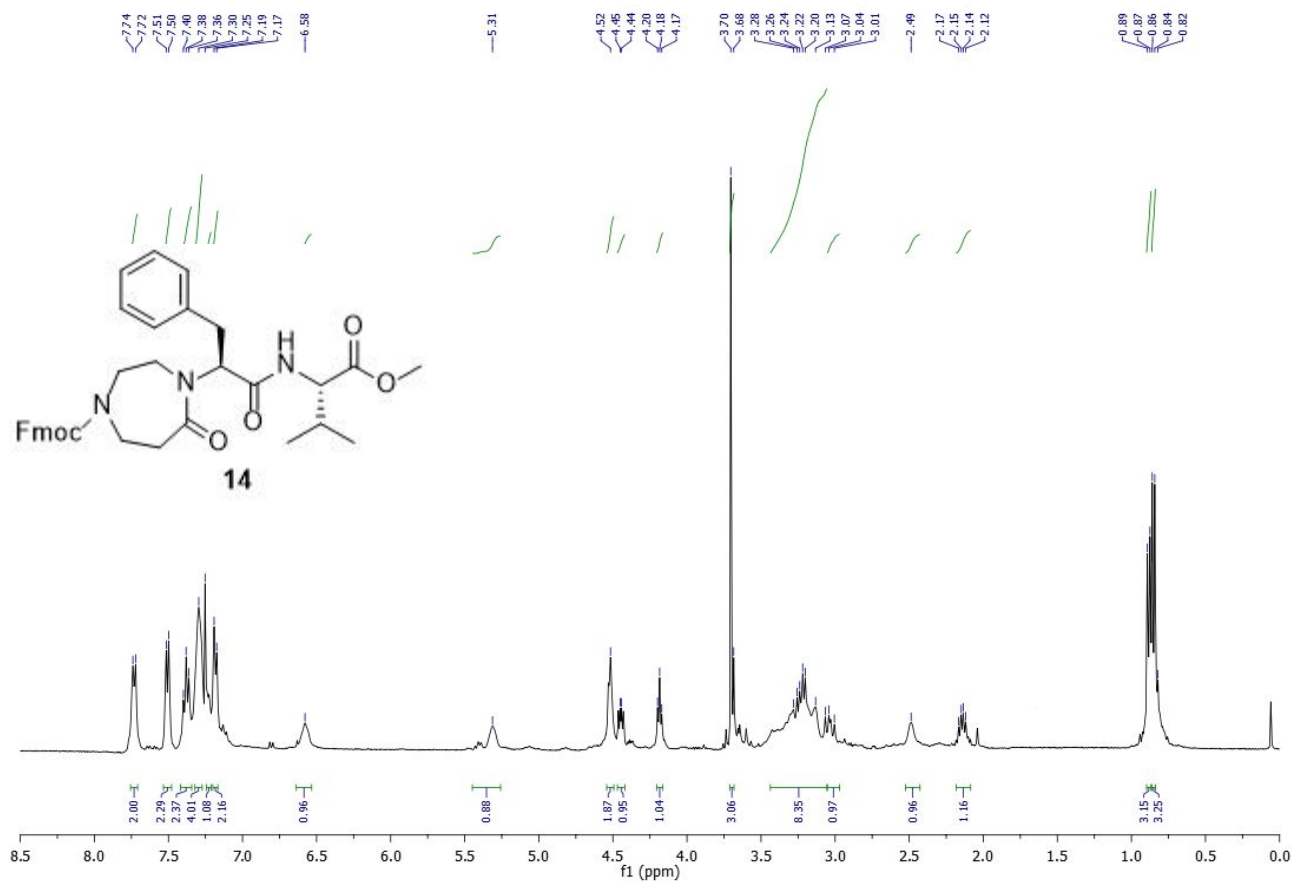

$^{13}\text{C}\{^1\text{H}\}$  NMR (100 MHz,  $\text{CDCl}_3$ )

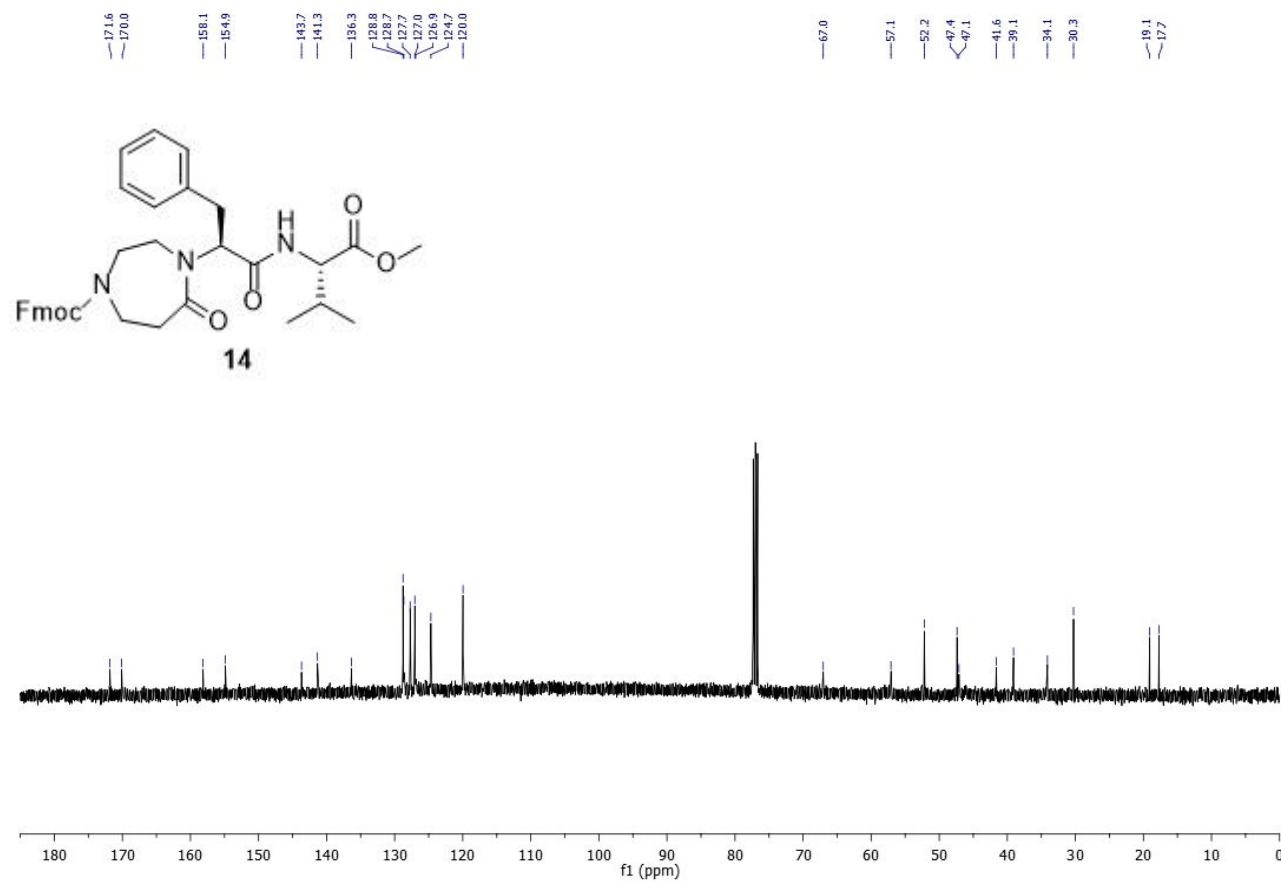

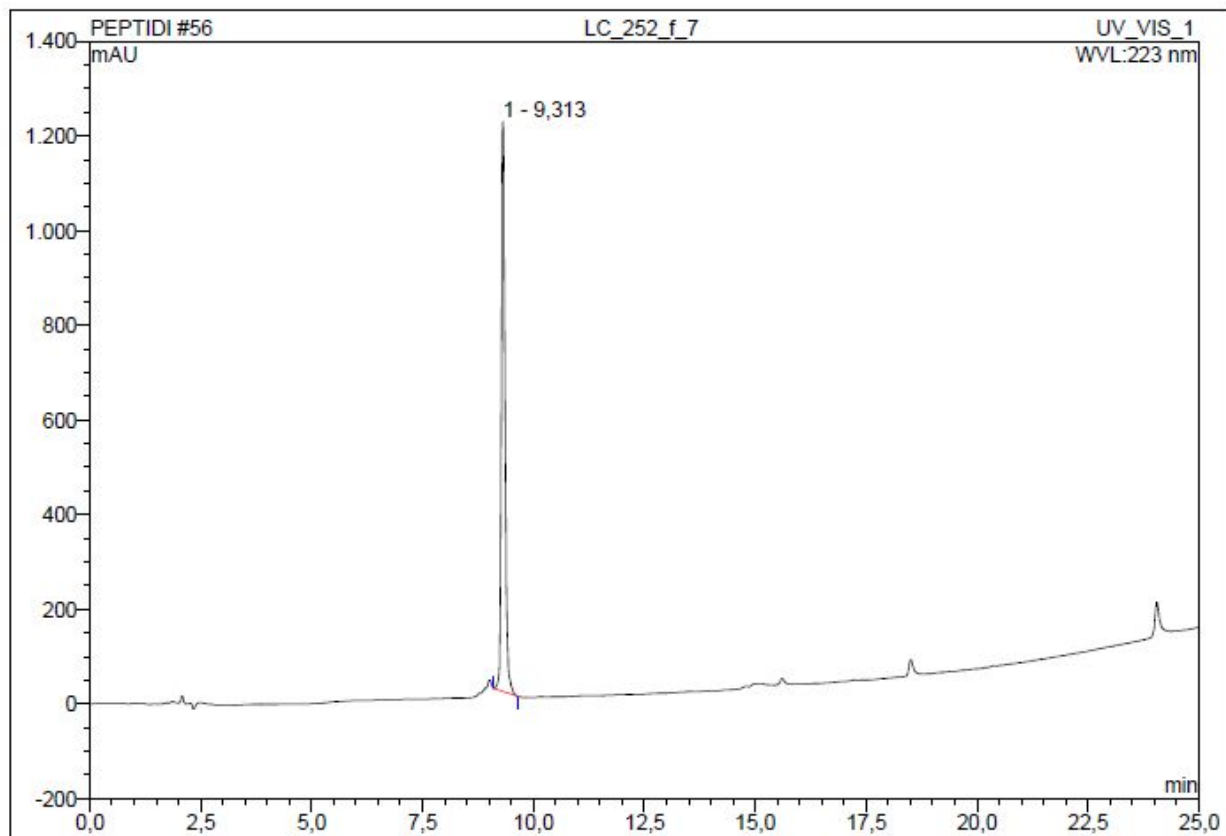

| No.           | Ret.Time<br>min | Peak Name | Height<br>mAU | Area<br>mAU*min | Rel.Area<br>% | Amount | Type |
|---------------|-----------------|-----------|---------------|-----------------|---------------|--------|------|
| 1             | 9,31            | n.a.      | 1203,637      | 116,137         | 100,00        | n.a.   | BMB  |
| <b>Total:</b> |                 |           | 1203,637      | 116,137         | 100,00        | 0,000  |      |

**Figure S1:** HPLC chromatogram of peptide 15.

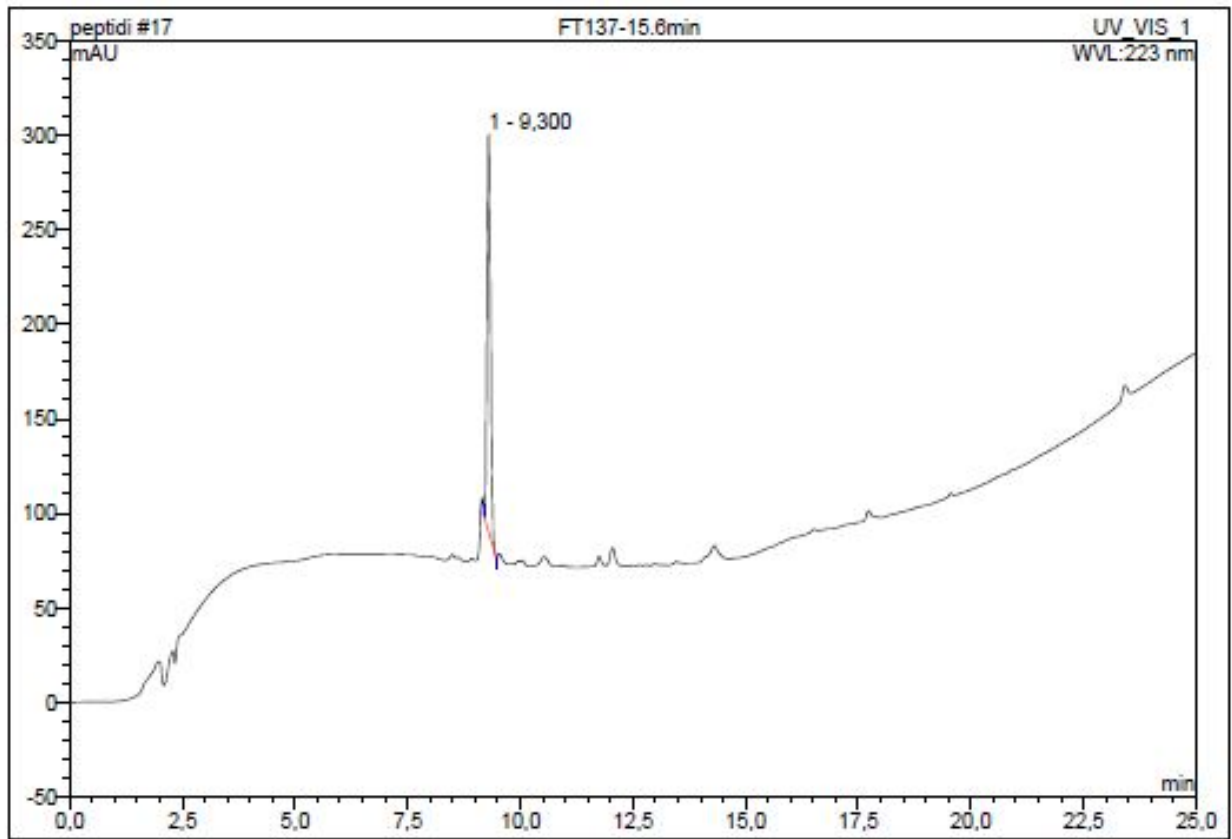

| No.           | Ret.Time<br>min | Peak Name | Height<br>mAU | Area<br>mAU*min | Rel.Area<br>% | Amount | Type |
|---------------|-----------------|-----------|---------------|-----------------|---------------|--------|------|
| 1             | 9,30            | n.a.      | 210,440       | 18,988          | 100,00        | n.a.   | BMB  |
| <b>Total:</b> |                 |           | 210,440       | 18,988          | 100,00        | 0,000  |      |

**Figure S2:** HPLC chromatogram of peptide 16

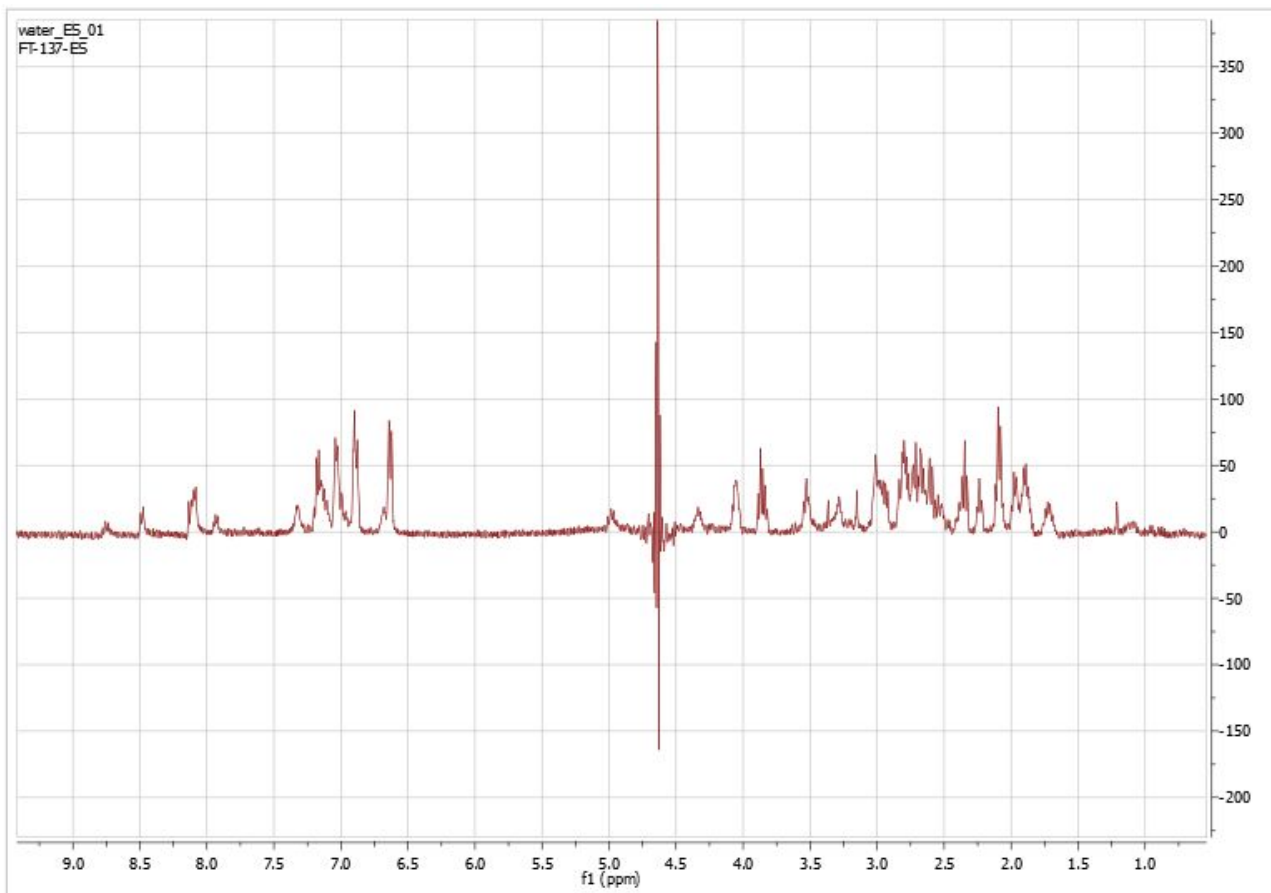

**Figure S3:** 1H-ES of peptide 16

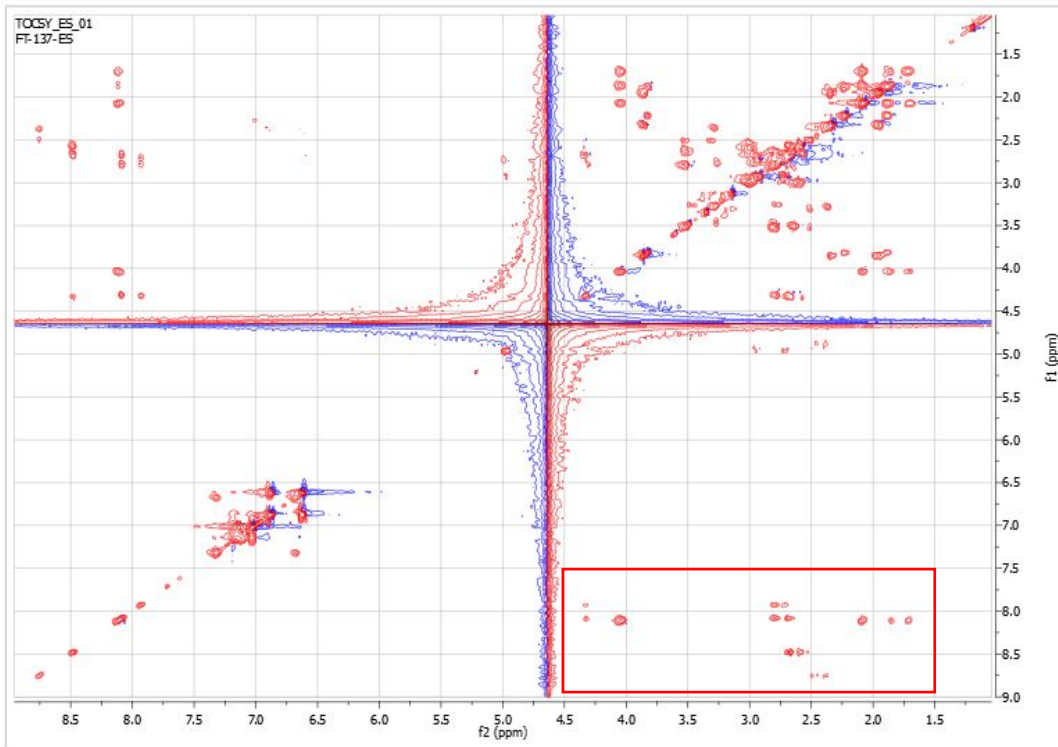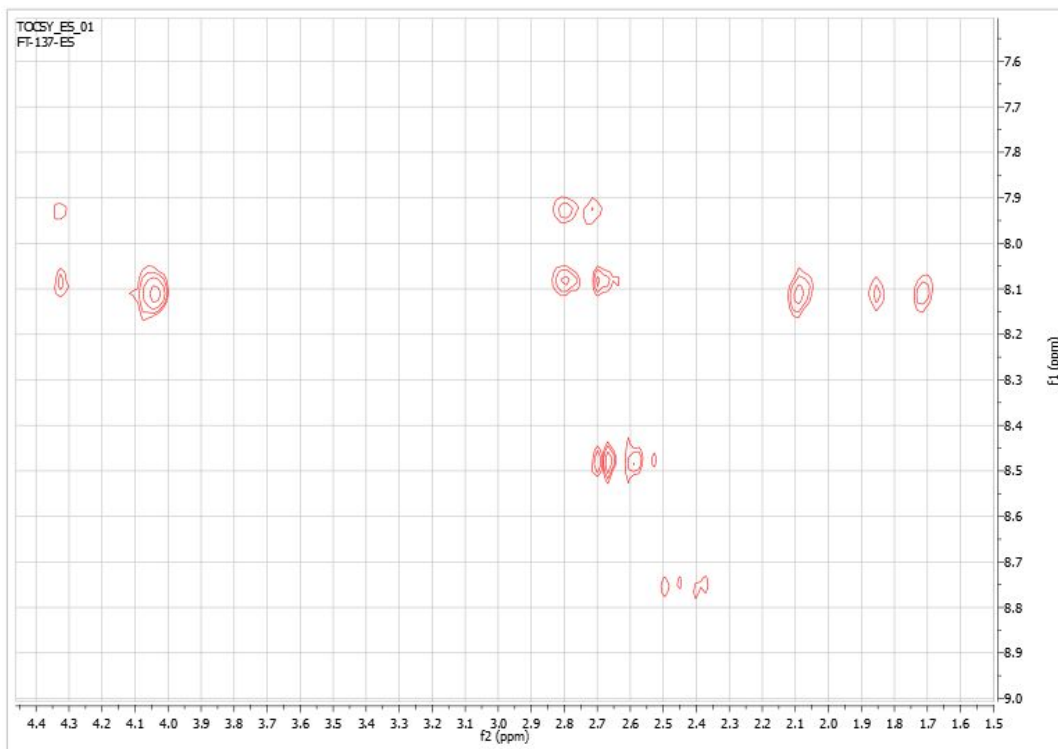

**Figure S4:** TOCSY-ES of peptide 16

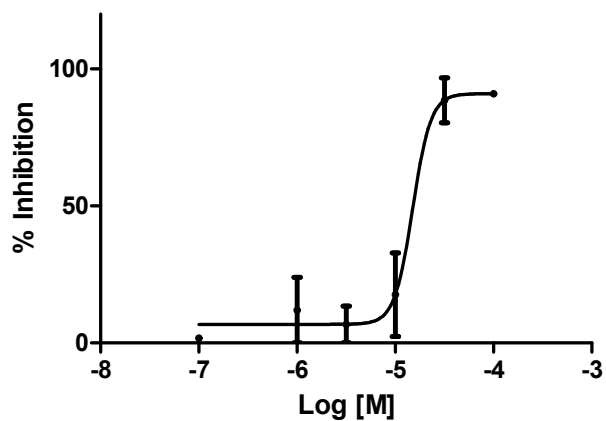

**Figure S5:** Inhibition curve of peptide **15** on 3CLPro enzyme.  $IC_{50} = 15 \pm 6 \mu\text{M}$ . Experiments were conducted in triplicate.

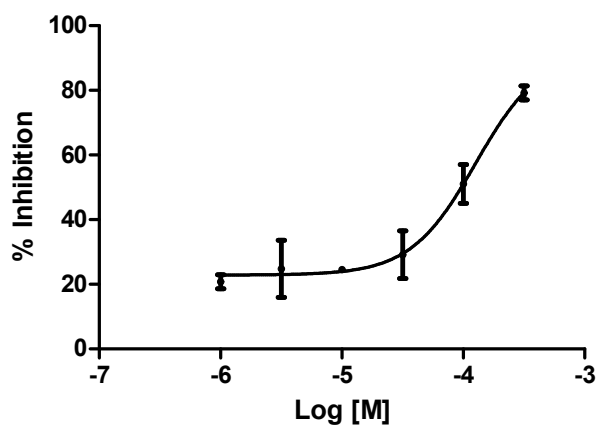

**Figure S6:** Inhibition curve of peptide **16** on 3CLPro enzyme.  $IC_{50} = 127 \pm 76 \mu\text{M}$ . Experiments were conducted in triplicate.

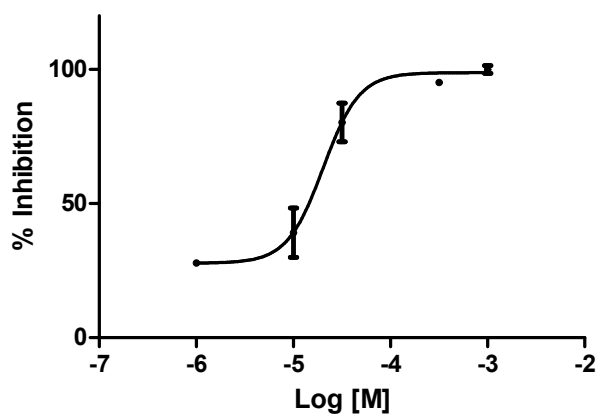

**Figure S7:** Inhibition curve of peptide **16** of Spike/ACE2 interaction.  $IC_{50} = 20 \pm 5 \mu\text{M}$ . Experiments were conducted in triplicate.
